# Supplementary material for: The preparation, characterization and catalytic activity of Ni NPs supported on porous alginate-g-poly(p-styrene sulfonamide-co-acrylamide)
Source: Royal Society of Chemistry journal article supplement (doi:10.1039/d1ra04022g), 2021-01-01

## Preparation, characterization and catalytic activity of Ni NPs supported on porous alginate-g-poly(*p*-styrene sulfonamide-*co*-acrylamide)

Sedigheh Alavinia, Ramin Ghorbani-Vaghei\*

Department of Organic Chemistry, Faculty of Chemistry, Bu-Ali Sina University, 6517838683, Hamadan, Iran

\*Corresponding author; E-mail: [rgvaghei@yahoo.com](mailto:rgvaghei@yahoo.com) and [ghorbani@basu.ac.ir](mailto:ghorbani@basu.ac.ir); Tel: +98(81)38380647

### 1. Experimental

All commercially available chemicals were obtained from Merck and Fluka companies and used without further purification otherwise stated. Nuclear magnetic resonance (NMR) spectra were recorded in CDCl<sub>3</sub> on Bruker Avance spectrometers 250 and 500 MHz for <sup>1</sup>H NMR and 63 and 125 MHz for <sup>13</sup>C NMR using TMS as an internal standard; chemical shifts were expressed in parts per million (ppm). Infrared (IR) spectroscopy was conducted on a Perkin Elmer GX FT-IR spectrometer. Mass spectra were recorded on a Shimadzu QP 1100 BX Mass Spectrometer. Melting points were determined on a Stuart Scientific SMP3 apparatus. Powder X-ray diffraction (PXRD) patterns recorded on a Rigaku XDS 2000 diffractometer using nickel-filtered CuKα radiation (λ = 1.5418) over a range of <50°. Thermo-gravimetric analysis (TGA) was performed on a PYRIS DIAMOND instrument. Inductively coupled plasma-atomic emission spectroscopy (ICP-AES) was conducted on a Varian Vista MPX ICPAES instrument. The qualitative analysis of Alg-PSSA-*co*-ACA@Ni was performed by using energy dispersive was performed by using energydispersive X-ray spectroscopy (EDS). Scanning electron microscopy (SEM) was performed on EM3200 instrument operated at 30 kV accelerating voltage. Transmission electron microscopy (TEM) was performed using a Zeiss-EM10C-100kv. Prior to the surface area analysis, the samples were activated in a high vacuum at 80 °C for 12 hr. All adsorption and desorption measurements were performed on a Micromeritics TriStar 3020 version 3.02 (N<sub>2</sub>) system and measured at 77 K. The data were analyzed using the TriStar II 3020 V1.03 software (Micromeritics, Norcross, GA). The pore size distributions were calculated from the adsorption–desorption isotherms. Wavelength-dispersive X-ray spectroscopy (WDX) was performed using a TESCAN mira3.

#### 1.1. Synthesis of silica alginate-g-poly (*p*-styrene sulfonamide-*co*-acrylamide) (SiO<sub>2</sub>@Alg-PSSA-*co*-ACA).

silica NPs was synthesized through the Stöber method.<sup>[1]</sup> Then, the mixture of *p*-Styrene sulfonamide (1.5 g), MBA (0.2 g) and SiO<sub>2</sub> NPs (0.05 g) was gradually added to the sodium alginate solution (0.5 g in 20 mL distilled water). Finally, ammonium persulfate (APS) (0.6 g) was added and the mixture stirred at 60 °C for 2 h. The synthesized SiO<sub>2</sub>@Alg-PSSA-*co*-ACA nanocomposite, in the form of gel, was dried at room temperature (weight: 5 g).

#### 1.2. Synthesis of porous alginate-g-poly(styrene sulfonamide-*co*-acrylamide) (Alg-PSSA-*co*-ACA).

In order to synthesize mesoporous structure, SiO<sub>2</sub> NPs of SiO<sub>2</sub>@Alg-PSSA-*co*-ACA were selectively removed through etching silica NPs by mixing HF solution (5 mL, 10 wt%) to the solution of SiO<sub>2</sub>@Alg-PSSA-*co*-ACA (1 g in 20 mL deionized water) in a plastic tube. The prepared solution was stirred for 3 h. The resultant porous Alg-PSSA-*co*-ACA was separated by filtration, washed with water, and dried (weight: 0.85 g).

### 1.3. Nickel nanoparticles immobilized on porous alginate-g-poly (*p*-styrene sulfonamide-*co*-acrylamide) (Alg-PSSA-*co*-ACA@Ni).

To synthesize the Alg-PSSA-*co*-ACA@Ni, the obtained porous Alg-PSSA-*co*-ACA (0.1 g) in the solution of NiCl<sub>2</sub>·6H<sub>2</sub>O (1 M, 5 mL) was stirred at room temperature for 2h, then the solution of NaBH<sub>4</sub> (10 mmol in 5 mL ethanol) was slowly added and stirred at room temperature for 60 min. The functionalized Alg-PSSA-*co*-ACA@Ni was separated with centrifusion, washed with distilled water (3 x 20 mL), and dried under vacuum conditions at room temperature for 12 h (weight: 0.3 g) (Scheme 1).<sup>[2]</sup> The amount of Ni incorporated in the support was 1.6 mmol g<sup>-1</sup>, as corroborated by ICP-OES.

### 1.4. General procedure for the synthesis of 1,3,4-oxadiazoles.

A mixture of substituted benzohydrazide (1 mmol), substituted aryl iodide (1 mmol), KHCO<sub>3</sub> (1 mmol), *tert*-butyl isocyanide (1.5 mmol), and Alg-PSSA-*co*-ACA@Ni (1.5 mol%, 9 mg) was refluxed in H<sub>2</sub>O:EtOH (2 mL, 1:1). After the completion of the reaction (by TLC :*n*-hexane/ethyl acetate, 10:4), the catalyst was separated from the reaction mixture by centrifugation, washed with ethanol (10 mL). Finally, the solvent of the reaction was evaporated and the solid obtained were crystallized from ethanol (10 mL). In some cases, the residue was purified by a short silica gel column *n*-hexane/ethylacetate (10:4).

## 2. Results and discussions

### 2.1. Catalyst characterization

The synthesized Alg-PSSA-*co*-ACA@Ni catalyst was fully characterized by FT-IR, TGA, ICP-MS, FESEM-EDX mapping techniques and N<sub>2</sub> isotherms. The FT-IR spectrum of sodium alginate, SiO<sub>2</sub>@Alg-PSSA-*co*-ACA, mesoporous Alg-PSSA-*co*-ACA, and Alg-PSSA-*co*-ACA@Ni is shown in Fig. 1. The results obtained from FT-IR spectrum show that: (I) the presence of SiO<sub>2</sub> NPs template, (II) the polymerization of PSSA and crosslinking of MBA groups (III) selective removal of the SiO<sub>2</sub> NPs from SiO<sub>2</sub>@Alg-PSSA-*co*-ACA (IV) the interaction of Ni NPs with the prepared support. FT-IR spectrum of NaAlg displayed vibration bands at 1642 and 1454 cm<sup>-1</sup> (due to vibrations of carboxylate anions). The vibration bands at 3412 cm<sup>-1</sup> and 2929.87 cm<sup>-1</sup> can be attributed to the O-H and C-H stretching, respectively (Fig. 1A). The FT-IR spectrum of SiO<sub>2</sub>@Alg-PSSA-*co*-ACA displayed new bands at 3363,

3090 and 1662  $\text{cm}^{-1}$  can be related to O-H, C-H and C=O amide stretching bands, respectively. The presence of these peaks confirmed successful crosslinking of MBA. In addition, the presence of new bands at 1328 and 1159  $\text{cm}^{-1}$  (due to the O=S=O stretching) was confirmed the successful polymerization of PSSA .<sup>[3]</sup> Also, the peaks at 1180  $\text{cm}^{-1}$  approved the  $\text{SiO}_2$  NPs presence (Fig. 1B).<sup>[4]</sup> After silica etching procedure, this peak was not observed in the FT-IR spectra of the porous Alg-PSSA-co-ACA and Alg-PBSA-co-ACA@Ni (Figs. 1C and 1D). In the FT-IR spectrum of Alg-PSSA-co-ACA@Ni (Fig. 1D), after interaction of Ni NPs with prepared support, the band at 3392  $\text{cm}^{-1}$  (due to the  $\text{NH}_2$  stretching, Fig. 3C) shifted to lower wave number (3363  $\text{cm}^{-1}$ ). In addition, the amide peaks shifted from 1633  $\text{cm}^{-1}$  to 1600  $\text{cm}^{-1}$ . Based on the strong co-ordination of Ni NPs with the composite, the IR absorption peaks of the organo-functions are slightly shifted to lower regions.

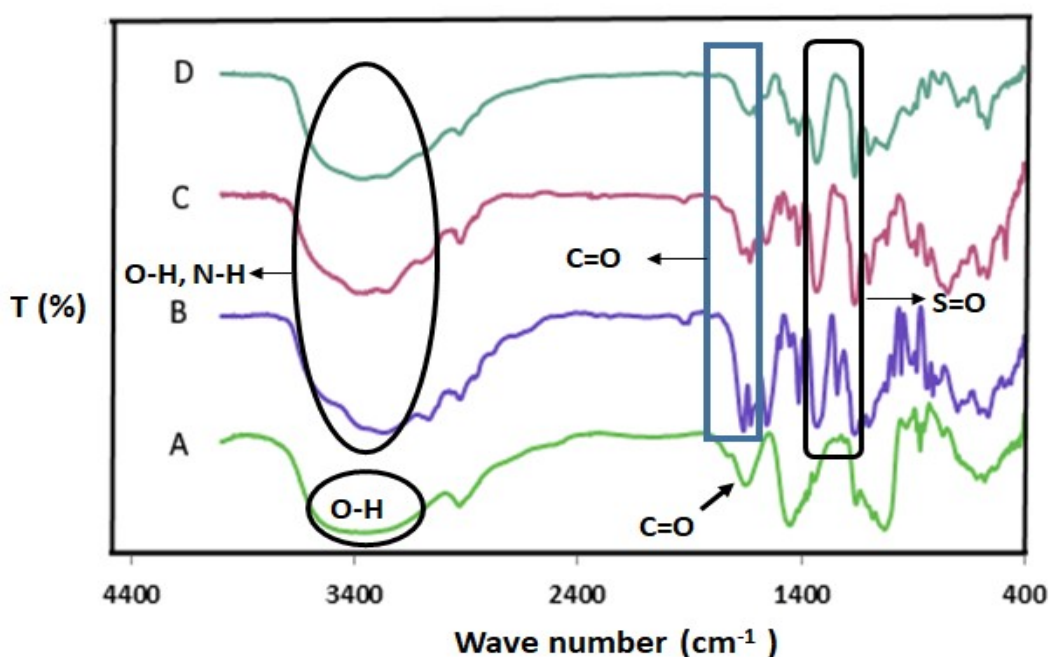

**Fig. 1.** FT-IR spectra of NaAlg (A),  $\text{SiO}_2$ @Alg-PBSA-co-ACA (B), Porous Alg-PSSA-co-ACA (C), Alg-PSSA-co-ACA@Ni (D).

Figure 2 shows the X-ray diffraction pattern of the Porous Alg-PSSA-co-ACA@Ni samples before (Fig. 2A) and after the reaction (Fig. 2B). Comparison of X-ray diffraction patterns of Alg-PSSA-co-ACA@Ni sample shows that the structure of prepared catalyst has not changed much after the reaction. The diffraction peaks appeared at  $2\theta=60^\circ$  can be attributed to the Ni nanoparticles.<sup>[5]</sup> Meanwhile, in the X-ray diffraction pattern of the Alg-PSSA-co-ACA@Ni nanocomposite sample, an amorphous phase is observed, which is related to the presence of amorphous polymer filaments of acrylamide ( $2\theta=20$ -30 degrees)<sup>[6]</sup>, and sodium alginate ( $2\theta=35$ -40 degrees)<sup>[7]</sup>, and polystyrene sulfonamide ( $2\theta=20$ -30 degrees).<sup>[8]</sup> It is noteworthy

that the crystal structure of the recovered catalyst sample is quite similar to that of the original catalyst structure only the peak positions of the appeared peaks has a bit changed., indicating the stability of the recovered catalyst. Therefore, the prepared catalyst can be used several times after a simple recovery period.

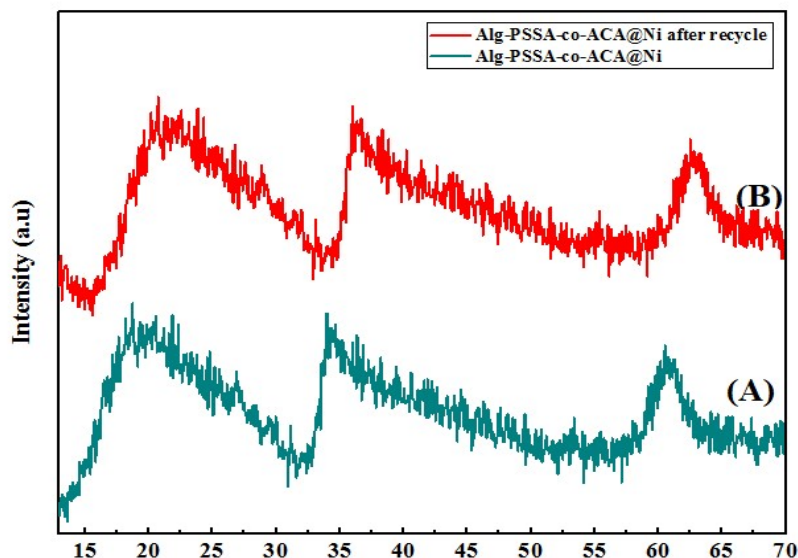

**Fig. 2.** XRD pattern of porous Alg-PSSA-co-ACA@Ni before (A) and after the reaction (B).

The morphology of SiO<sub>2</sub> nanoparticles, mesoporous Alg-PSSA-co-ACA and Alg-PSSA-co-ACA@Ni was characterized with FE-SEM analysis (Fig. 3). The FE-SEM of spherical SiO<sub>2</sub> NPs showed a uniform distribution (Fig. 3A). FE-SEM image of Alg-PSSA-co-ACA that obtained from silica template method demonstrated the mesoporous structure of Alg-PSSA-co-ACA (Fig. 3B). Fig. 3B shows the rough morphology of the surface which causes more activity of catalyst. Fig. 3C and Fig. 3D showed the distribution of spherical shaped Ni particles on the surface of mesoporous Alg-PSSA-co-ACA.

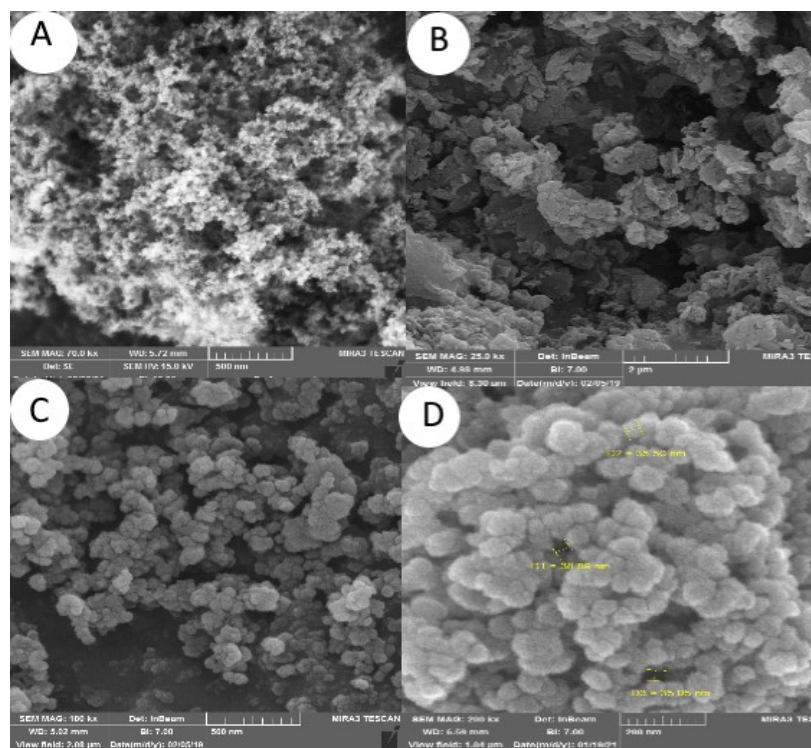

**Fig. 3.** FE-SEM photographs of SiO<sub>2</sub>NPs (A), mesoporous Alg-PSSA-*co*-ACA (B), mesoporous Alg-PSSA-*co*-ACA@Ni (C-D).

HR-TEM images of Alg-PSSA-*co*-ACA@Ni (Fig. 4A) and recovered catalyst (Fig. 4B) are depicted in Fig. 4. HR-TEM images showed that the sample has uniform ~20 nm particles. Good dispersion of Ni species was visible in higher magnifications HR-TEM image, a very thin layer of porous polymer could be detected around the Ni NPs. In the prepared catalyst, the porous Alg-PSSA-*co*-ACA can play the roles of both reducing and capping agents. In addition, deposition of Ni NPs was verified by the means of EDX. HR-TEM image demonstrated the presence of Ni NPs along with polymer in the catalyst without any noticeable change compare with the original one. In comparison with the fresh particles (Fig. 4A), the number of the Ni NPs distributed on the mesoporous Alg-PSSA-*co*-ACA substrate seems to be reduced. It may be a reason for the observed reduction in the catalytic performance after 7-time recycling. To obtain more confirmation on this claim, the inductively coupled plasma optical emission spectroscopy (ICP-OES) was performed on a sample of the supernatant after seventh time of the particles usage, and it was revealed that 1.55 mmol·g<sup>-1</sup> of Ni element exist in the sample. It means that the leaching of the Ni element from the catalytic system is an inevitable event, but this partial leaching does not have any significant effects on the catalytic performance.

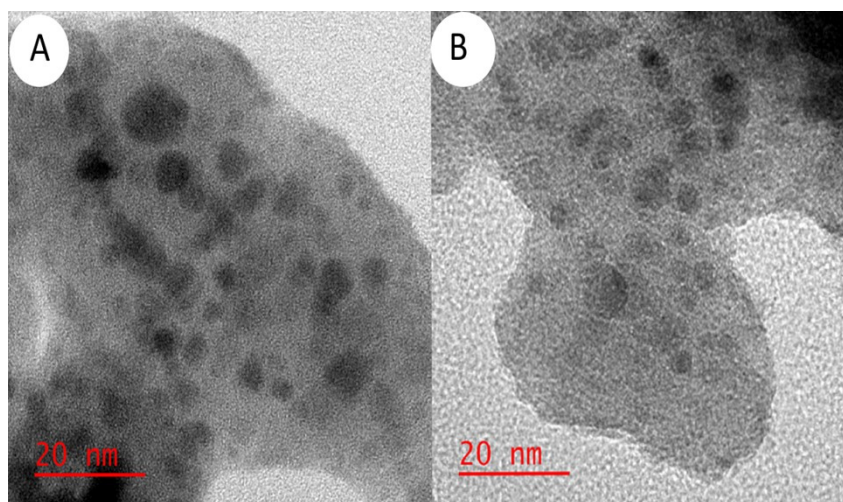

**Fig. 4.** HR-TEM photographs of mesoporous Alg-PSSA-*co*-ACA@Ni before (A) and after the reaction (B).

The elemental composition of the Alg-PSSA-*co*-ACA@Ni was determined by EDS analysis and presence of (Na, O, S, C, N and, Ni) was confirmed (Fig. 5). From the weight percentage results of the EDS analysis of the prepared catalyst (Table 1), it can be understood that the successful polymerization of *para*-styrene sulfonamide (S: 30.41%). The presence of the N (9.28%) and O (26.10) also confirmed the



crosslinking of MBA and the polymerization of PSSA (Table 1). In addition, elemental mapping exhibited the uniform distribution of all the elements, as shown in Fig. 6. In addition, proper dispersion of Ni NPs is obvious, in the composite.

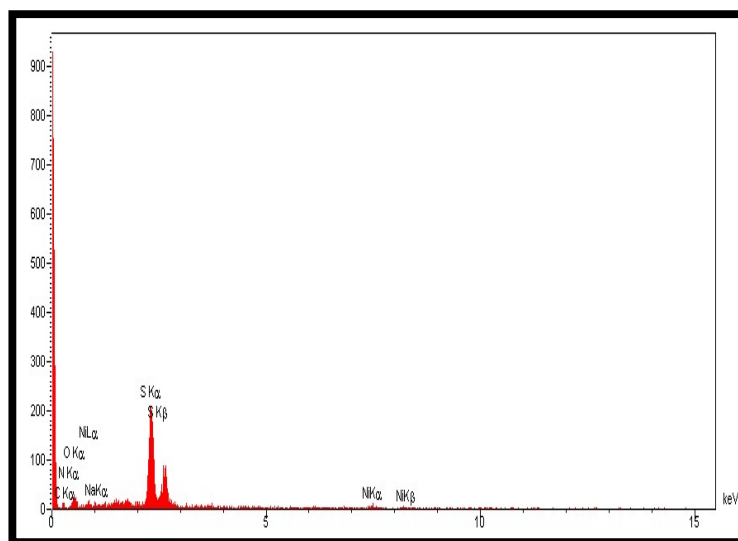

**Fig. 5.** EDX spectrum of Alg-PSSA-co-ACA@Ni.

**Table 1.** Elemental percentage of Alg-PSSA-co-ACA@Ni.

| Element | W%    | A%    |
|---------|-------|-------|
| C       | 28.34 | 42.36 |
| N       | 9.28  | 6.76  |
| O       | 26.10 | 29.28 |
| Na      | 1.13  | 0.88  |
| S       | 30.41 | 19.27 |
| Ni      | 4.74  | 1.45  |
| Totals  | 100.0 |       |

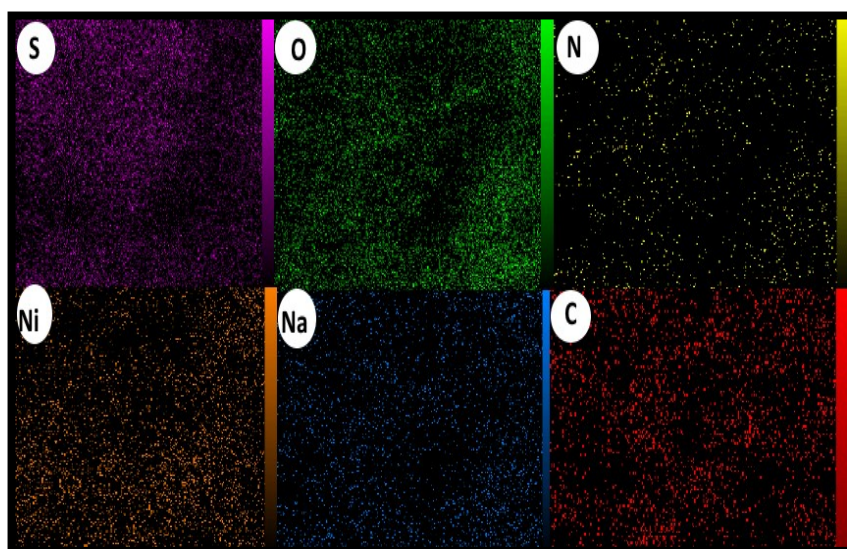

**Fig. 6.** Elemental mapping of the C, N, O, S, Ni and Na atoms achieved from SEM micrographs.

Fig. 7 shows the TGA curve of Alg-PSSA-*co*-ACA@Ni in which a small weight loss from 30 to 100 °C was witnessed, clearly related to the physically absorbed water. After this, the weight loss in the range of 230–320 °C clearly indicated the degradation of Alg-PSSA-*co*-ACA groups.<sup>[9]</sup>

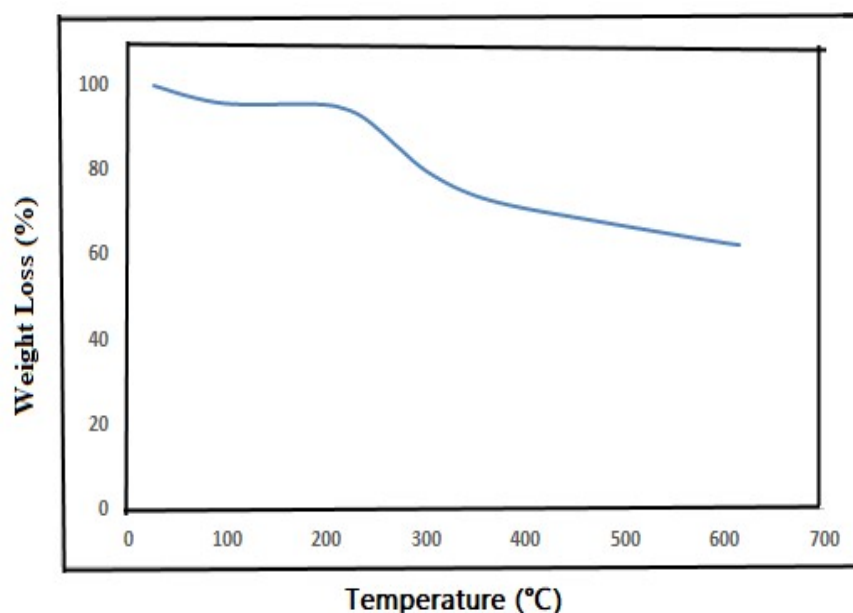

**Fig. 7.** TGA curve of Alg-PSSA-*co*-ACA@Ni.

As shown in Fig. 8, according to the Brunauer–Emmett–Teller (BET) analysis, Alg-PSSA-*co*-ACA (Fig. 8A) and Alg-PSSA-*co*-ACA@Ni (Fig. 8B) indicated a typical type IV isotherm with type H3 hysteresis (defined by IUPAC).<sup>[10]</sup> The results of N<sub>2</sub>-adsorption and desorption isotherms of Alg-PSSA-*co*-ACA and Alg-PSSA-*co*-ACA@Ni clearly demonstrated the immobilization of Ni NPs significantly reduces the pore diameter, pore volume and specific surface area (Table 2).

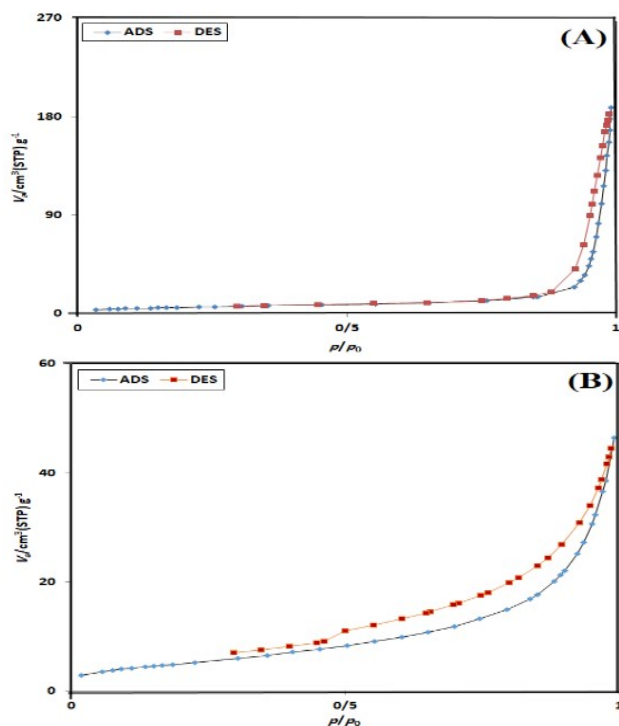

**Fig. 8.** N<sub>2</sub> adsorption–desorption isotherms of porous Alg-PSSA-*co*-ACA (A) and Alg-PSSA-*co*-ACA@Ni (B).

**Table 2.** Texture parameters obtained from nitrogen adsorption studies.

| Sample                      | SBET (m <sup>2</sup> g <sup>-1</sup> ) | Pore diameter by BJH method (nm) | Pore volume (cm <sup>3</sup> g <sup>-1</sup> ) |
|-----------------------------|----------------------------------------|----------------------------------|------------------------------------------------|
| Alg-PSSA- <i>co</i> -ACA    | 22.41                                  | 25.55                            | 0.27                                           |
| Alg-PSSA- <i>co</i> -ACA@Ni | 21.30                                  | 1.88                             | 0.07                                           |

The N<sub>2</sub> adsorption-desorption isotherms of the 7th reused catalyst (Fig. 9) were measured in order to determine the textural properties. It can be seen from Fig. 9 that reused catalyst indicate a typical type IV isotherm with type H3 hysteresis (defined by IUPAC), which are identified as mesoporous material.<sup>[10]</sup>

The N<sub>2</sub> adsorption-desorption isotherms of reused catalyst indicates that there was no obvious change for the catalyst composition after the reaction. The changes associated to the textural properties of the 7th reused catalyst can be due to the fact that reactants which were distributed inside the Alg-PSSA-*co*-ACA@Ni pores during the reaction (Pore volume = 0.05 cm<sup>3</sup>g<sup>-1</sup>, SBET= 6.41 m<sup>2</sup>g<sup>-1</sup>).

#### References:

- [1] W. Stöberand, A. Fink, *J. Colloid. Interf. Sci.* 1968, **26**, 62-69.
- [2] S. Khan, A. Ghatak, S. Bhar, *Tetrahedron Lett.* 2015, **56**, 2480-2487.
- [3] A. G. Ibrahim, A. Z. Sayed, H. A. El-Wahab, M. M. Sayah, *Am. J. Polym. Sci. Technol.* 2019, **5**, 55-62.
- [4] J. Lin, H. Huang, M. Wang, J. Deng, *Polym. Chem.* 2016, **7**, 1675-1681.



- [5] M.R. Ahghari, V. Soltaninejad, A. Maleki, *Sci. Rep.* 2020, **28**, 1-0.
- [6] T.A. Saleh, A.M. Elsharif, S. Asiri, A.R. Mohammed, H. Dafalla. *Environ. Nanotechnol. Monit. Manag.* 2020, **14**, 100302.
- [7] A. Ahmed, F. Mohamed, A.M. Elzanaty, O.F. Abdel-Gawad *Int. J. Biol. Macromol.* 2021, **167**, 766-776.
- [8] L. Jia , D. Wang , L. Liu , S. Zhang , T. Xu , *Des Monomers Polym*, 2014, **17**, 425–429 .
- [9] Z. Bahrami, A. Akbari, B. Eftekhari-Sis, *Int. J. Biol. Macromol.* 2019, **129**, 187–197.
- [10] S.W. Sing, W. Kenneth, *Adsorp. Sci. Technol.* 2004, **22**, 773-782.

$P/P_0$

**Fig.9.** N<sub>2</sub> adsorption–desorption isotherms of the recovered Alg-PSSA-co-ACA@Ni.

**Preparation, characterization and catalytic activity of Ni NPs supported on porous alginate-g-poly(*p*-styrene sulfonamide-*co*-acrylamide)**

Sedigheh Alavinia, Ramin Ghorbani-Vaghei\*

Department of Organic Chemistry, Faculty of Chemistry, Bu-Ali Sina University, 6517838683, Hamadan, Iran

\*Corresponding author; E-mail: [rgvaghei@yahoo.com](mailto:rgvaghei@yahoo.com) and [ghorbani@basu.ac.ir](mailto:ghorbani@basu.ac.ir); Tel: +98(81)38380647

## Spectra Data:

### 2-(2-Bromophenyl)-5-phenyl-1,3,4-oxadiazole.

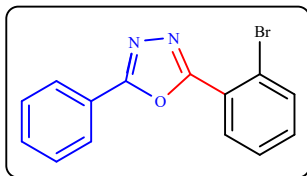

The general procedure was followed. Purification by column chromatography (silica gel, *n*-hexan/EtOAc, 10:3) gave the desired product as a yellow solid. M.p. 148–150 °C,<sup>[1]</sup> M.p. 145–147 °C, <sup>1</sup>H NMR (500 MHz, CDCl<sub>3</sub>-*d*3) δ 6.83 (d, 2H, *J* = 8 Hz), 6.94 (t, 1H, *J* = 7.2 Hz), 7.30 (dd, 3H, *J* = 7.6, 5.6 Hz), 7.45 (t, 1H, *J* = 7.6 Hz), 7.69 (d, 1H, *J* = 7.6 Hz), 7.80 (dd, 1H, *J* = 6.4, 1.2 Hz); <sup>13</sup>C NMR (125 MHz, DMSO-*d*<sub>6</sub>) δ 164.7, 163.2, 135.1, 132.6, 132.4, 132.1, 129.8, 129.4, 127.2, 127.1, 126.1, 123.6, 122.9. MS *m/z*: 299.1

### 2-(2-Chlorophenyl)-5-(pyridin-4-yl)-1,3,4-oxadiazole.

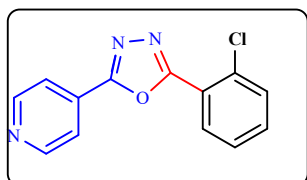

The general procedure was followed. Purification by column chromatography (silica gel, *n*-hexan/EtOAc, 10:3) gave the desired product as a yellow solid. M.p. 128–130 °C,<sup>[2]</sup> <sup>1</sup>H NMR (500 MHz, DMSO-*d*<sub>6</sub>) δ 8.85 (d, *J* = 4.8 Hz, 1H), 8.16 (d, *J* = 2.8 Hz, 1H), 8.12 – 8.03 (m, 2H), 7.87 (d, *J* = 5.5 Hz, 1H), 7.72 (dd, *J* = 8.1, 2.4 Hz, 1H), 7.65 (qd, *J* = 8.0, 7.5, 2.7 Hz, 1H), 7.51 (td, *J* = 8.0, 3.1 Hz, 1H). <sup>13</sup>C NMR (125 MHz, DMSO-*d*<sub>6</sub>) δ 164.1, 163.3, 151.3, 134.6, 133.7, 133.3, 132.6, 131.9, 131.0, 130.7, 129.2, 128.3, 126.9, 126.0, 125.4, 120.8. MS *m/z*: 257.1

### 2-(5-Phenyl-1,3,4-oxadiazol-2-yl) benzaldehyde.

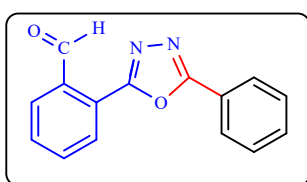

The general procedure was followed. Purification by column chromatography (silica gel, *n*-hexan/EtOAc, 10:3) gave the desired product as a yellow solid. M.p. 180–181 °C; <sup>1</sup>H NMR (500 MHz, DMSO-*d*<sub>6</sub>) δ <sup>1</sup>H NMR (500 MHz, DMSO-*d*<sub>6</sub>) δ 6.85 (d, 2H, *J* = 8.4 Hz), 7.19 (t, 2H, *J* = 7.6 Hz), 7.44 (d, 1H, 4.8 Hz), 7.49 (dd, 2H, *J* = 7.6, 7.2 Hz), 7.61 (d, 2H, *J* = 7.2 Hz); 8.88 (s, 1H). <sup>13</sup>C NMR (125 MHz, DMSO-*d*<sub>6</sub>) δ, 169.2, 160.1, 147.4, 146.8, 138.7, 134.8, 134.7, 134.1, 132.3, 132.2, 130.8, 130.4, 129.5, 128.0, 127.6, 127.2, 125.8, 125.0, 124.8, 124.5, 124.4, 124.1, 122.7. MS *m/z*: 250.07

### 2-(3-Chlorophenyl)-5-phenyl-1,3,4-oxadiazole.

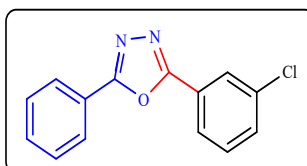

The general procedure was followed. Purification by column chromatography (silica gel, *n*-hexan/EtOAc, 10:3) gave the desired product as a white solid. M.p. 119–121 °C;<sup>[3]</sup> <sup>1</sup>H NMR (250 MHz, DMSO-*d*<sub>6</sub>) δ 8.07-8.20 (m, 4H), 7.57-7.73 (m, 5H). MS *m/z*: 257.04

#### 2-(3-Chlorophenyl)-5-(pyridin-4-yl)-1,3,4-oxadiazole.

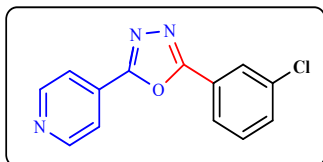

The general procedure was followed. Purification by column chromatography (silica gel, *n*-hexan/EtOAc, 10:3) gave the desired product as a white solid. M.p. 143–145 °C;<sup>[4]</sup> <sup>1</sup>H NMR (250 MHz, DMSO-*d*<sub>6</sub>) δ 8.85 (s, 2H), 8.19 (s, 1H), 8.10 (s, 3H), 7.69 (dq, *J* = 14.7, 7.7 Hz, 2H). <sup>13</sup>C NMR (63 MHz, DMSO-*d*<sub>6</sub>) δ 164.1, 163.2, 151.3, 134.5, 132.6, 131.9, 130.7, 126.9, 126.0, 125.3, 121.0. MS *m/z*: 257.6.

#### 2-(4-Bromophenyl)-5-methyl-1,3,4-oxadiazole.

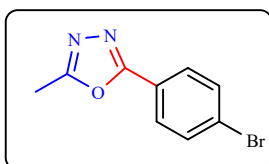

The general procedure was followed. Purification by column chromatography (silica gel, *n*-hexan/EtOAc, 10:3) gave the desired product as a yellow solid. M.p. 110–112 °C;<sup>[5]</sup> <sup>1</sup>H NMR (250 MHz, DMSO-*d*<sub>6</sub>) δ 8.06 (d, *J* = 8.2 Hz, 2H), 7.83 (d, *J* = 8.2 Hz, 2H), 2.56 (s, 3H). MS *m/z*: 237.9.

#### 2-Benzyl-5-phenyl-1,3,4-oxadiazole.

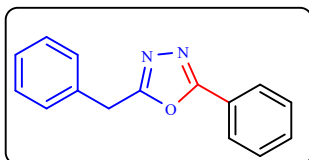

The general procedure was followed. Purification by column chromatography (silica gel, *n*-hexan/EtOAc, 10:3) gave the desired product as a yellow solid. M.p. 102–103 °C;<sup>[6]</sup> <sup>1</sup>H NMR (250 MHz, DMSO-*d*<sub>6</sub>) δ 7.93 (d, *J* = 6.9 Hz, 2H), 7.56 (d, *J* = 6.2 Hz, 4H), 7.36 (d, *J* = 4.4 Hz, 4H), 4.34 (s, 2H). <sup>13</sup>C NMR (63 MHz, DMSO-*d*<sub>6</sub>) δ 165.9, 164.6, 134.8, 132.2, 129.7, 129.2, 127.6, 126.7, 123.7, 31.2. MS *m/z*: 236.2.

#### 2-(4-Bromophenyl)-5-phenyl-1,3,4-oxadiazole.

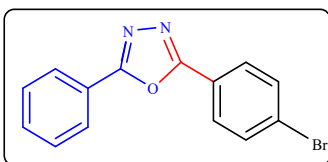

The general procedure was followed. Purification by recrystallization with EtOH gave the desired product as a white solid. M.p. 165–166 °C;<sup>[1]</sup> <sup>1</sup>H NMR (250 MHz, DMSO-*d*<sub>6</sub>) δ 8.18 – 7.97 (m, 3H), 7.83 (d, *J* = 7.2 Hz, 3H), 7.71 – 7.55 (m, 3H). <sup>13</sup>C NMR (63 MHz, DMSO-*d*<sub>6</sub>) δ 164.8, 163.8, 132.9, 132.5, 129.8, 129.0, 127.7, 126.1, 123.6, 122.9.

#### 4-(5-Phenyl-1,3,4-oxadiazol-2-yl) aniline.

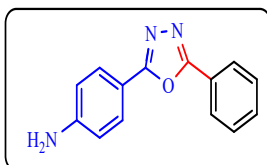

The general procedure was followed. Purification by column chromatography (silica gel, *n*-hexan/EtOAc, 10:3) gave the desired product as a yellow solid. M.p. 191–193 °C; <sup>1</sup>H NMR (250 MHz, DMSO-*d*<sub>6</sub>) δ 8.18 – 7.98 (m, 2H), 7.75 (d, *J* = 8.2 Hz, 2H), 7.58 (s, 3H), 6.69 (d, *J* = 8.2 Hz, 2H), 5.98 (s, 1H). <sup>13</sup>C NMR (63 MHz, DMSO) δ 165.2, 163.0, 152.9, 131.9, 129.7, 128.9, 128.6, 127.9, 126.7, 124.1, 114.0, 110.0. MS *m/z*: 237.2.

**2-Benzyl-5-(p-tolyl)-1,3,4-oxadiazole.**

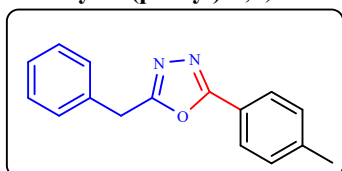

The general procedure was followed. Purification by column chromatography (silica gel, *n*-hexan/EtOAc, 10:3) gave the desired product as a white solid. M.p. 93–94 °C; <sup>1</sup>H NMR (250 MHz, DMSO-*d*<sub>6</sub>) δ 7.79 (d, *J* = 7.8 Hz, 2H), 7.61 – 6.96 (m, 7H), 4.31 (s, 2H), 2.48 (s, 3H). <sup>13</sup>C NMR (63 MHz, DMSO-*d*<sub>6</sub>) δ 165.6, 164.7, 142.3, 136.2, 134.9, 130.3, 129.7, 129.5, 129.3, 129.1, 128.6, 127.9, 127.6, 126.9, 126.7, 121.0, 31.2, 21.4.

**2-Phenyl-5-(pyridin-4-yl)-1,3,4-oxadiazole.**

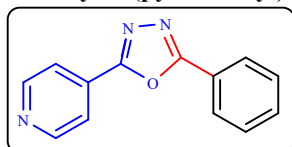

The general procedure was followed. Purification by recrystallization with EtOH gave the desired product as a white solid. M.p. 139–140 °C; <sup>1</sup>H NMR (250 MHz, DMSO-*d*<sub>6</sub>) δ 8.83 (s, 2H), 8.13 (d, *J* = 6.5 Hz, 2H), 8.03 (d, *J* = 5.0 Hz, 2H), 7.62 (d, *J* = 9.2 Hz, 3H). <sup>13</sup>C NMR (63 MHz, DMSO-*d*<sub>6</sub>) δ 165.2, 162.9, 151.3, 132.8, 130.9, 129.9, 127.3, 123.4, 120.7. MS *m/z*: 223.2.

**2-(4-Chlorophenyl)-5-(pyridin-4-yl)-1,3,4-oxadiazole**

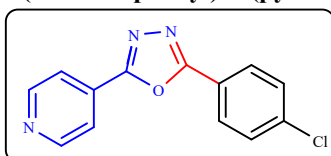

The general procedure was followed. Purification by recrystallization with EtOH gave the desired product as a white solid. M.p. 140–143 °C; <sup>1</sup>H NMR (250 MHz, DMSO-*d*<sub>6</sub>) δ 8.14 (d, *J* = 8.8 Hz, 4H), 7.70 (d, *J* = 7.5 Hz, 2H), 7.62 – 7.48 (d, *J* = 8 Hz, 2H), 2.42 (s, 3H). MS *m/z*: 257.04.

**2-(Pyridin-4-yl)-5-(p-tolyl)-1,3,4-oxadiazole.**

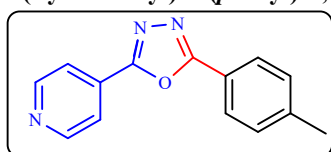

The general procedure was followed. Purification by recrystallization with EtOH gave the desired product as a white solid. M.p. 140–142 °C; <sup>1</sup>H NMR (500 MHz, DMSO-*d*<sub>6</sub>) δ 8.13 (d, *J* = 5 Hz, 2H), 8.04 – 8.00 (d, *J* = 2.5 Hz, 2H), 7.64 (d, *J* = 5 Hz, 2H), 7.44 (d, *J* = 7.9 Hz, 2H), 2.42 (s, 3H). <sup>13</sup>C NMR (125 MHz, dmsO) δ 164.5, 164.2, 142.6, 132.4, 130.4, 130.4, 129.8, 127.1, 127.0, 123.8, 121.0, 21.6. MS *m/z*: 237.2.

**2-(2-Chlorophenyl)-5-phenyl-1,3,4-oxadiazole**

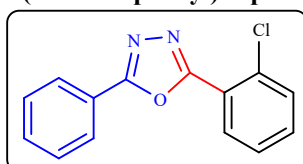

The general procedure was followed. Purification by column chromatography (silica gel, *n*-hexan/EtOAc, 10:3) gave the desired product as a yellow solid. M.p. 96–98 °C; <sup>1</sup>H NMR (250 MHz, DMSO-*d*<sub>6</sub>) δ 8.10 (ddt, *J* =

7.9, 4.6, 1.4 Hz, 3H), 7.73 (dt,  $J = 7.9, 1.3$  Hz, 1H), 7.70 – 7.52 (m, 5H).  $^{13}\text{C}$  NMR (125 MHz, DMSO- $d_6$ )  $\delta$   $^{13}\text{C}$  NMR (63 MHz, DMSO)  $\delta$  133.7, 132.7, 131.8, 131.6, 129.9, 128.3, 127.2, 123.5. MS  $m/z$ : 257.6.

**4-(5-Phenyl-1,3,4-oxadiazol-2-yl) benzoic acid.**

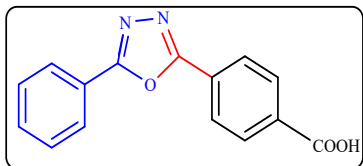

The general procedure was followed. Purification by recrystallization with EtOH gave the desired product as a yellow solid. M.p. 217–218°C,  $^{121}$   $^1\text{H}$  NMR (500 MHz, DMSO- $d_6$ )  $\delta$  12.6 (s, 1H), 8.34 (s, 1H), 8.24 (d,  $J = 8.0$  Hz, 1H), 8.19 – 8.09 (m, 4H), 7.64 (d,  $J = 10$ Hz, 3H).  $^{13}\text{C}$  NMR (126 MHz, DMSO- $d_6$ )  $\delta$  166.9, 164.8, 163.9, 134.0, 132.6, 132.5, 130.6, 129.9, 129.8, 129.6, 128.0, 127.4, 127.3, 127.2, 127.1, 123.6. MS  $m/z$ : 266.6.

**2-(4-Bromophenyl)-5-(3-methoxyphenyl)-1,3,4-oxadiazole.**

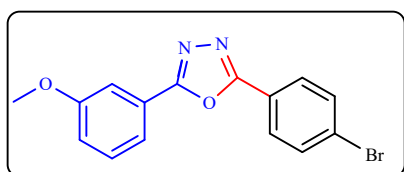

The general procedure was followed. Purification by recrystallization with EtOH gave the desired product as a white solid. M.p. 152–153 °C,  $^{131}$   $^1\text{H}$  NMR (400 MHz, DMSO- $d_6$ )  $\delta$  8.06 (d,  $J = 8.0$  Hz, 2H), 7.82 (d,  $J = 8.0$  Hz, 2H), 7.70 (d,  $J = 8.0$  Hz, 1H), 7.60 (s, 1H), 7.54 (t,  $J = 7.7$  Hz, 1H), 7.21 (dd,  $J = 8, 4$  Hz, 1H), 3.89 (s, 3H).  $^{13}\text{C}$  NMR (100 MHz, DMSO- $d_6$ )  $\delta$  164.5, 164.4, 160.0, 132.6, 131.2, 129.8, 127.1, 124.6, 123.4, 119.4, 118.5, 111.9, 111.8, 55.8. MS  $m/z$ : 330.0.

**2,5-Diphenyl-1,3,4-oxadiazole.**

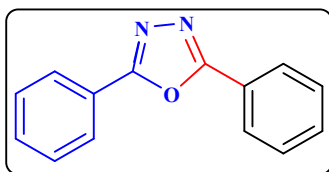

The general procedure was followed. Purification by recrystallization with EtOH gave the desired product as a white solid. M.p. 132–133 °C,  $^{141}$   $^1\text{H}$  NMR (400 MHz, DMSO- $d_6$ )  $\delta$  8.12 (dd,  $J = 8, 4$  Hz, 4H), 7.63 (m, 6H),  $^{13}\text{C}$  NMR (101 MHz, DMSO)  $\delta$  164.6, 132.6, 129.9, 127.1, 123.5.

**2-(4-Bromophenyl)-5-(p-tolyl)-1,3,4-oxadiazole.**

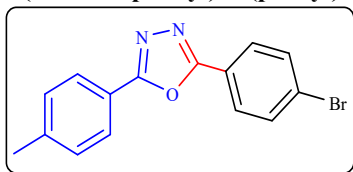

The general procedure was followed. Purification by recrystallization with EtOH gave the desired product as a white solid. M.p. 200–202 °C,  $^{61}$   $^1\text{H}$  NMR (400 MHz, DMSO- $d_6$ )  $\delta$  8.06 (d,  $J = 8.4$  Hz, 2H), 8.01 (d,  $J = 8$  Hz, 1H), 7.83 (d,  $J = 6$  Hz, 2H), 7.65 (d,  $J = 8.4$  Hz, 1H), 7.44 (d,  $J = 8$  Hz, 2H), 2.49 (s, 3H). MS  $m/z$ : 315.0.

**2-Phenyl-5-(p-tolyl)-1,3,4-oxadiazole.**

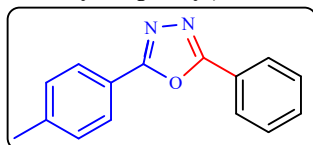

The general procedure was followed. Purification by recrystallization with EtOH gave the desired product as a white solid. M.p. 122–124°C,  $^{144}$   $^1\text{H}$  NMR (400 MHz, DMSO- $d_6$ )  $\delta$  8.13-8.10 (m, 3H), 8.06 (d,  $J = 9.6$  Hz, 1H), 7.82 (d,  $J = 8$  Hz, 1H), 7.64 (t,  $J = 6.4$  Hz, 4H), 2.51 (s, 3H).  $^{13}\text{C}$  NMR (100 MHz, DMSO- $d_6$ )  $\delta$  164.6, 163.8, 132.9, 132.0, 129.8, 129.0, 127.1, 126.1, 123.7, 123.0, 23.2.  $m/z$ : 236.

**2-(3-Methoxyphenyl)-5-phenyl-1,3,4-oxadiazole.**



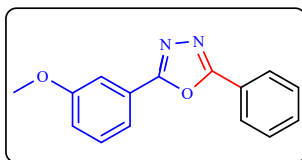

The general procedure was followed. Purification by recrystallization with EtOH gave the desired product as a white solid. M.p. 148-149°C; <sup>1</sup>H NMR (400 MHz, DMSO-*d*<sub>6</sub>) δ 8.09 (dd, 3.2, 1.2 Hz, 2H), 7.66 (dd, *J* = 7.7, 1.3 Hz, 1H), 7.64 – 7.59 (m, 3H), 7.56 (t, *J* = 1.6 Hz, 1H), 7.51 (t, *J* = 8.0 Hz, 1H), 7.21 (dd, 4.0, 2.8 Hz, 1H), 3.82 (s, 3H). <sup>13</sup>C NMR (100 MHz, DMSO-*d*<sub>6</sub>) δ 164.5, 164.4, 160.0, 132.6, 131.2, 129.8, 127.1, 124.6, 123.4, 119.4, 118.5, 111.9, 111.8, 55.8. *m/z*: 252.2.

#### 2-(4-Bromophenyl)-5-(pyridin-4-yl)-1,3,4-oxadiazole.

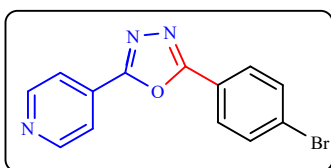

The general procedure was followed. Purification by recrystallization with EtOH gave the desired product as a white solid. M.p. 180°C; <sup>1</sup>H NMR (400 MHz, DMSO-*d*<sub>6</sub>) δ 8.83 (d, *J* = 5.8 Hz, 2H), 8.08 (dd, *J* = 10.0, 7.3 Hz, 4H), 7.84 (d, *J* = 8.5 Hz, 2H). <sup>13</sup>C NMR (101 MHz, DMSO-*d*<sub>6</sub>) δ 151.2, 133.0, 129.3, 120.9. *m/z*: 300.1.

#### 2-(2,3-Dichlorophenyl)-5-phenyl-1,3,4-oxadiazole.

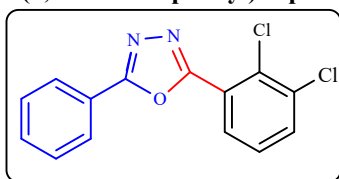

The general procedure was followed. Purification by column chromatography (silica gel, *n*-hexan/EtOAc, 10:3) gave the desired product as a yellow solid. M.p. 146–147 °C; <sup>1</sup>H NMR (400 MHz, DMSO-*d*<sub>6</sub>) δ 8.51 (ddd, *J* = 7.8, 6.7, 1.4 Hz, 2H), 8.29 (t, *J* = 7.9 Hz, 2H), 7.96 (t, *J* = 7.8 Hz, 2H), 7.57 (dd, *J* = 2, 1.2 Hz, 2H), 7.49 (t, *J* = 7.6 Hz, 1H). <sup>13</sup>C NMR (100 MHz, DMSO) δ 155.5, 134.6, 132.6, 131.2, 129.1, 128.7, 127.9, 118.6, 118.5, 118.3.

#### 2-(2-Methoxyphenyl)-5-phenyl-1,3,4-oxadiazole.

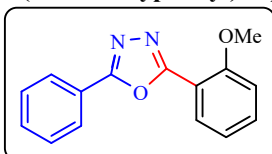

The general procedure was followed. Purification by column chromatography (silica gel, *n*-hexan/EtOAc, 10:3) gave the desired product as a yellow solid. M.p. 118-120 °C; <sup>1</sup>H NMR (400 MHz, DMSO-*d*<sub>6</sub>) δ 7.60 (d, *J* = 6.4 Hz, 2H), 7.44 (t, *J* = 7.8 Hz, 2H), 7.20 (t, *J* = 7.8 Hz, 2H), 7.13 (d, *J* = 8.3 Hz, 1H), 7.07 (t, *J* = 7.5 Hz, 1H), 6.74 (t, *J* = 7.3 Hz, 1H), 3.87 (s, 3H). <sup>13</sup>C NMR (101 MHz, DMSO) δ 156.4, 145.9, 130.5, 129.0, 128.4, 120.6, 119.3, 118.1, 113.6, 113.6, 111.5, 55.7.

#### 2-(4-Fluorophenyl)-5-phenyl-1,3,4-oxadiazole.

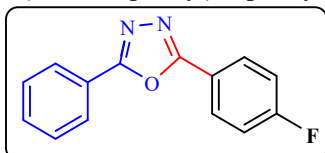

The general procedure was followed. Purification by recrystallization with EtOH gave the desired product as a yellow solid, M.p. 150-151 °C; <sup>1</sup>H NMR (400 MHz, DMSO-*d*<sub>6</sub>) δ 8.64 (t, *J* = 5.6 Hz, 2H), 8.33 (t, *J* = 8.7 Hz, 2H), 8.19 (t, *J* = 7.7 Hz, 2H), 7.84 (d, *J* = 7.9 Hz, 1H), 7.75 (t, *J* = 7.3 Hz, 1H), 7.70 (d, *J* = 9.6 Hz, 1H). <sup>13</sup>C NMR (101 MHz, DMSO-*d*<sub>6</sub>) δ 163.3, 160.9, 145.7, 129.0, 119.4, 116.4, 115.9, 115.6, 113.8.

#### 2-(4-Methoxyphenyl)-5-phenyl-1,3,4-oxadiazole.

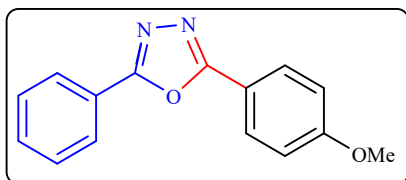

Known compound, the general procedure was followed. Purification by recrystallization with EtOH gave the desired product as a white solid; M.p. 149-150 °C.<sup>[14]</sup>

**2-(4-Chlorophenyl)-5-phenyl-1,3,4-oxadiazole:**

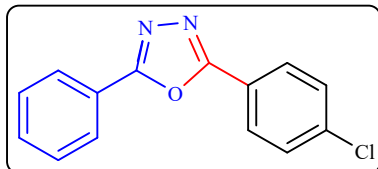

Known compound, the general procedure was followed. Purification by recrystallization with EtOH gave the desired product as a white solid; M.p. 159-160 °C.<sup>[14]</sup>

**References:**

1. Li. Zhengyi, W. Liang, *Adv. Synth. Catal.* 2015, **357**, 3469 – 3473.
2. S. J. Gilani, S. Ahmad Khan and N. Siddiqui, *Acta Poloniae Pharmaceutica-Drug Research*, 2011, **68**, 205-211.
3. Y. Fanzhi, K. Julian, A. Lutz, *Angew. Chem.* 2016, **128**, 4837 – 4840.
4. R. Chandra Sekhar, *Synth. Commun.* 2004, **34**, 2153 – 2157.
5. L. Qiang, T. Yi, X. Dongfang, Z. Haobing, D. Liping, *J. Chin. Chem. Soc.* 2014, **61**, 665 – 670.
6. G. Peng, W. Yunyang, *Heterocycl Comm*, 2013, **19**, 113 – 119.
7. W. Kun-Li; L. Gang, C. Po-Hao, P. Liang, T. Hsin-Luen, *Org. Electron.* 2014, **15**, 322 – 336.
8. M. Tomoya, H. Koji, S.Tetsuya, M. Masahiro, *Org. Lett.* 2010, **12**, 1360 – 1363.
9. M. Geeta Sai, D. Kavitha, S. Nagula, K. Ahmed, *New. J. Chem.* 2019, **43**, 15999 – 16006.
10. Y. Wenquan, H. Gang, Z. Yueteng, L. Hongxu, D. Lihong, Y. Xuejun, L. Yujiang, C. Junbiao, *J. Org. Chem.* 2013, **78**, 10337 – 10343.
11. W. Liang, C. Jing, C. Qun, He. Mingyang, *J. Org. Chem.* 2015, **80**, 4743 – 4748.
12. A.P. Grekow, O.P. Schvaika, *Journal of general chemistry of the USSR*, 1960, **30**, 3763 – 3766.
13. S. Zhenhua, *Synth. Commun.* 2006, **36**, 2927 – 2937.
14. G. Majji, S. Kumar Rout, S. Guin, A. Gogoi and B. K. Patel, *RSC Adv.* 2014, **4**, 5357
15. P. Parikh, *J. Indian. Chem. Soc.* 1989, **66**, 250 – 251.

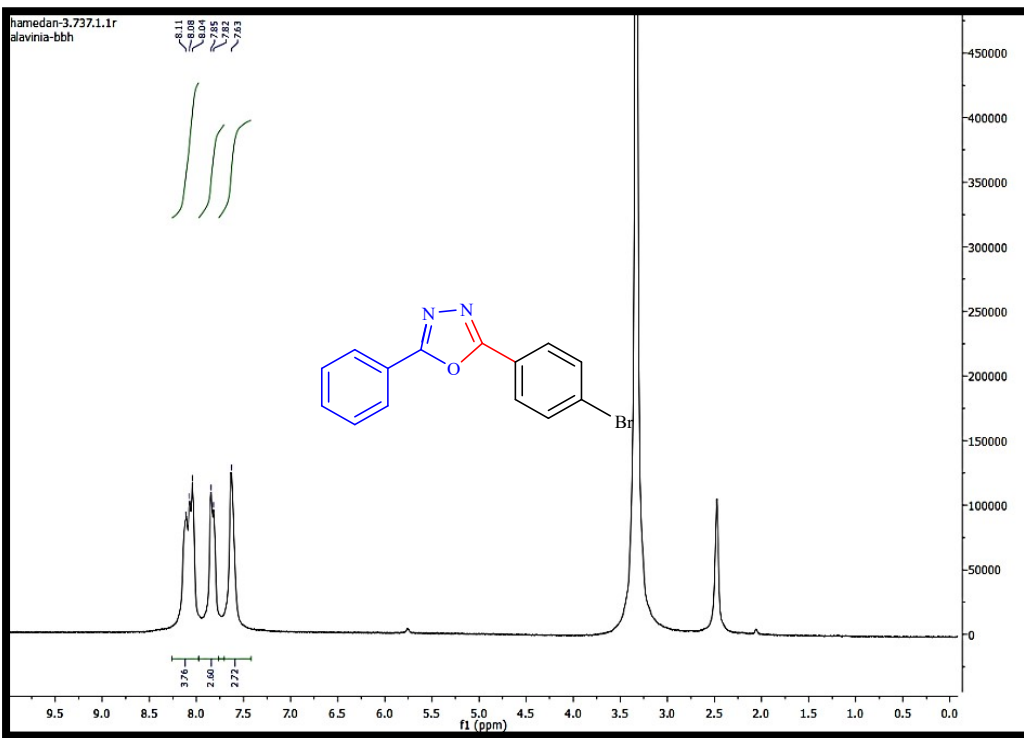

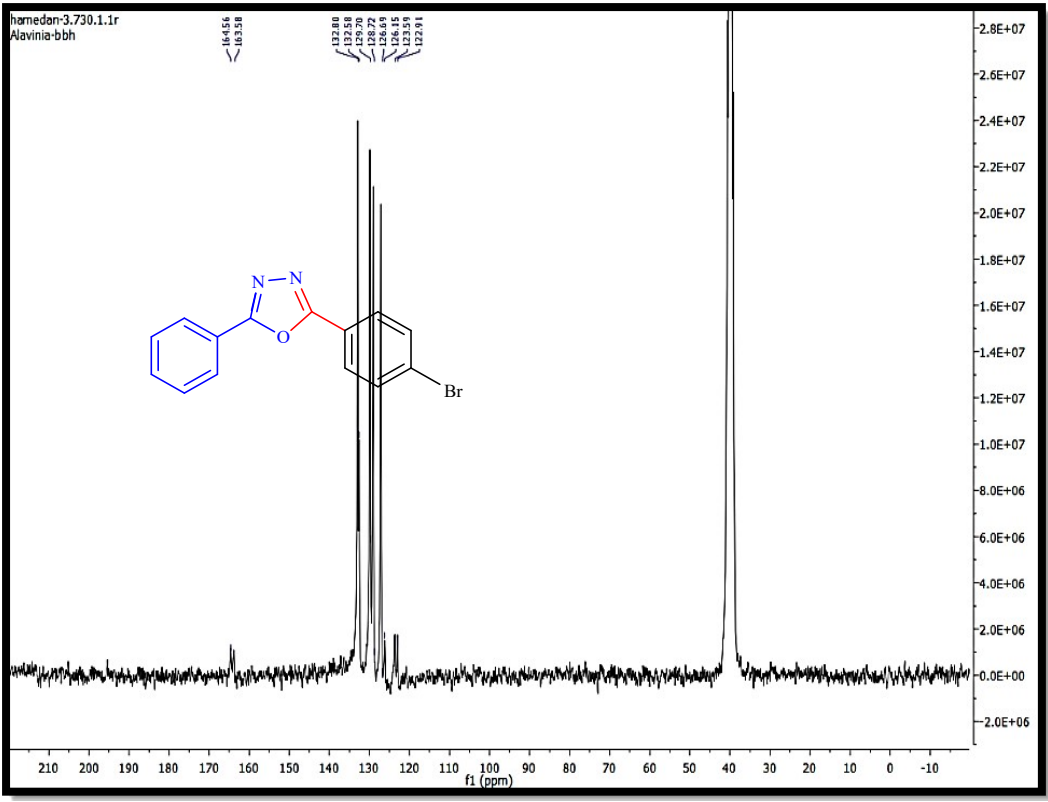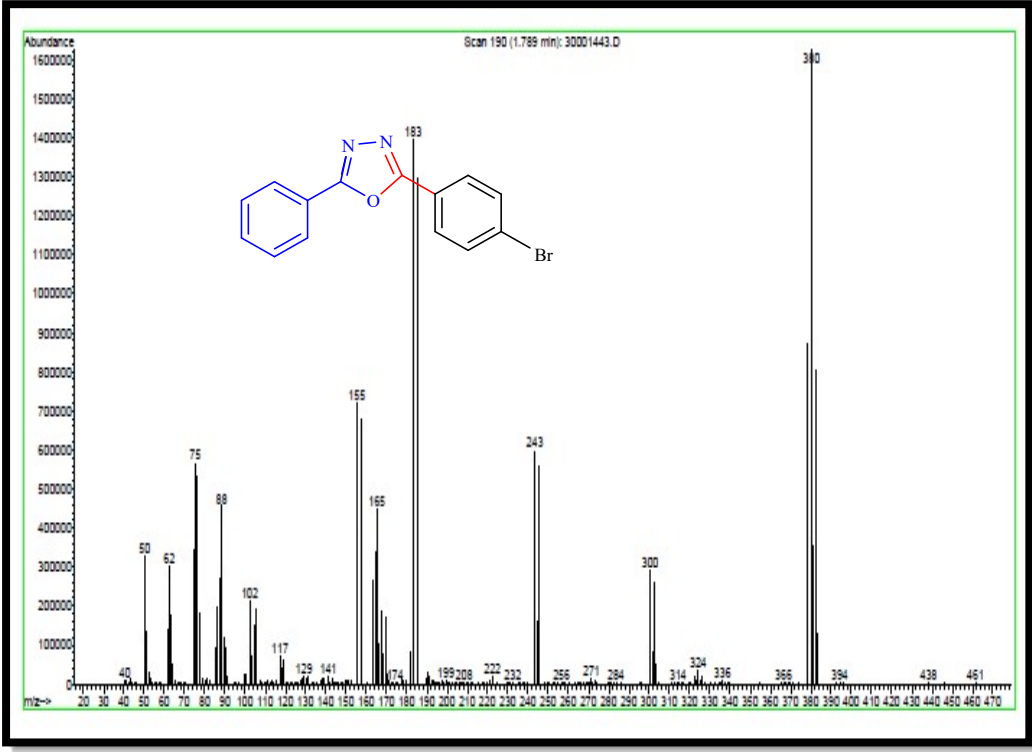

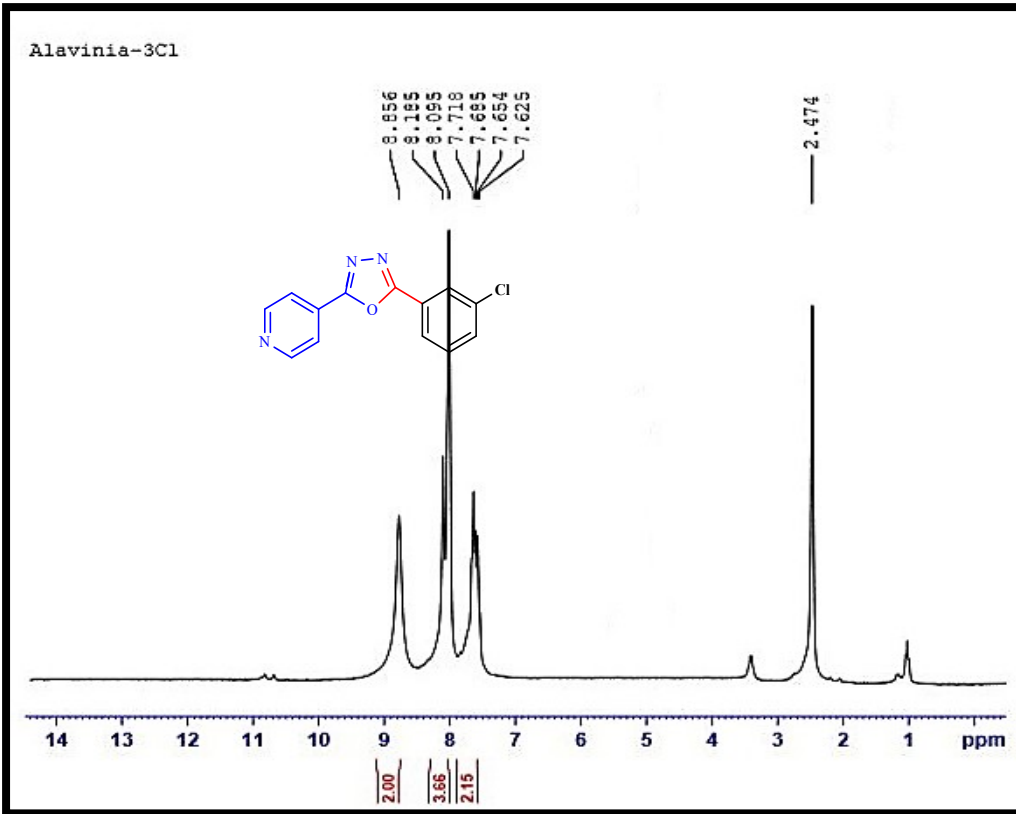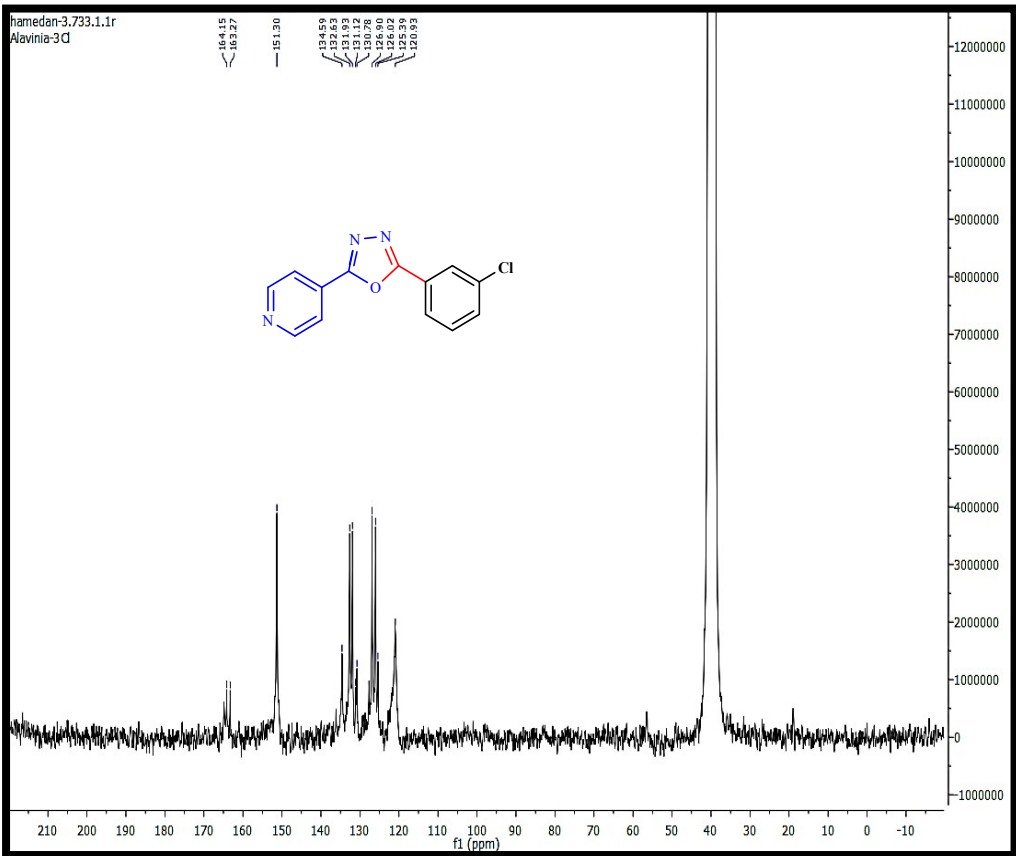

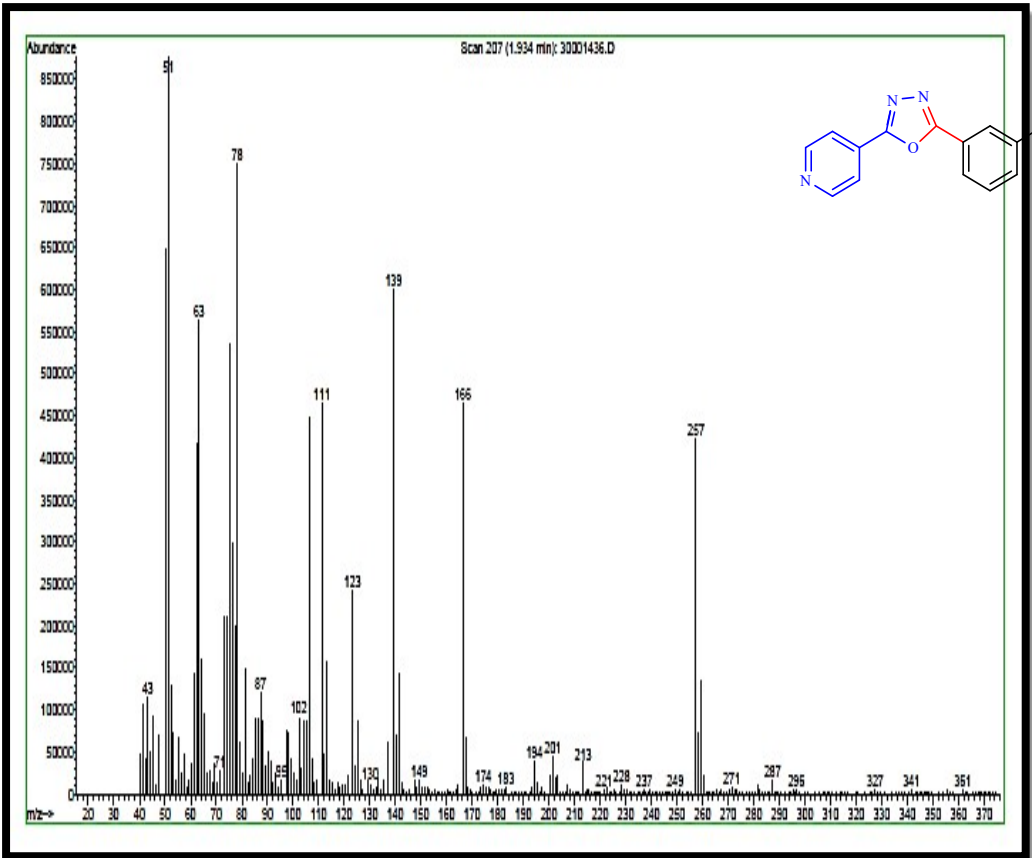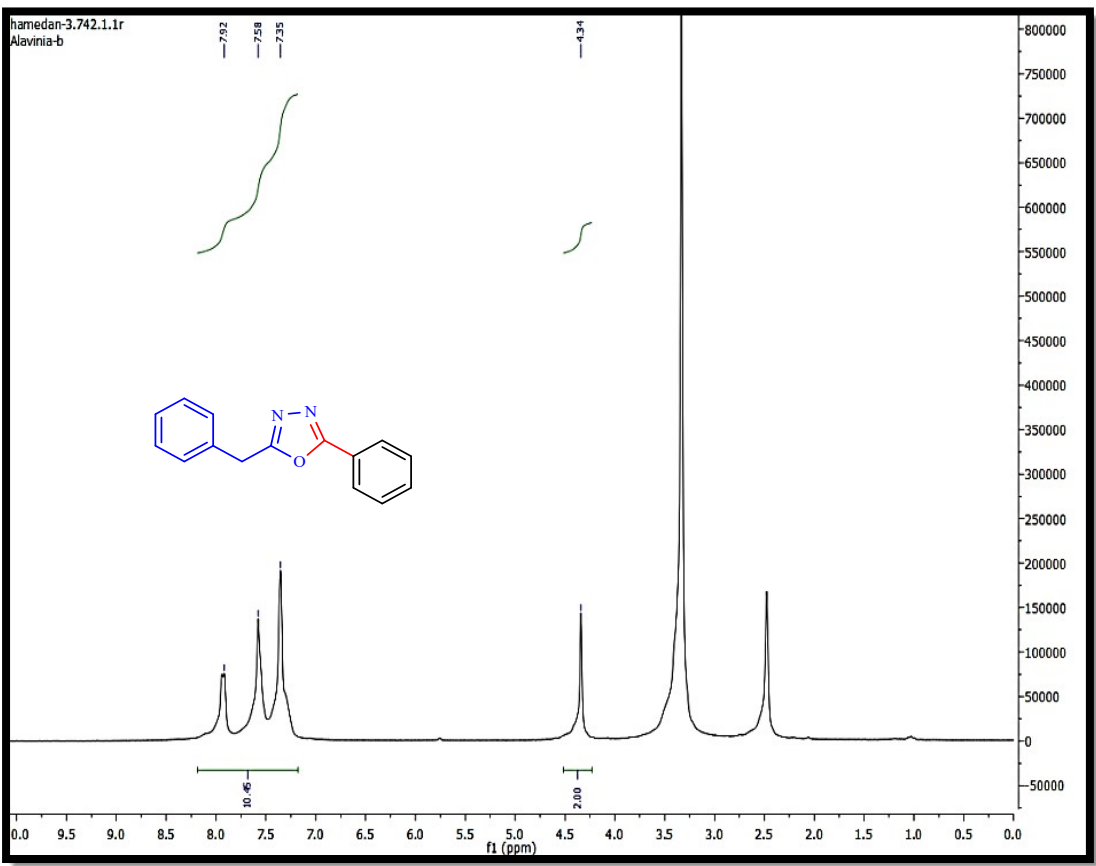



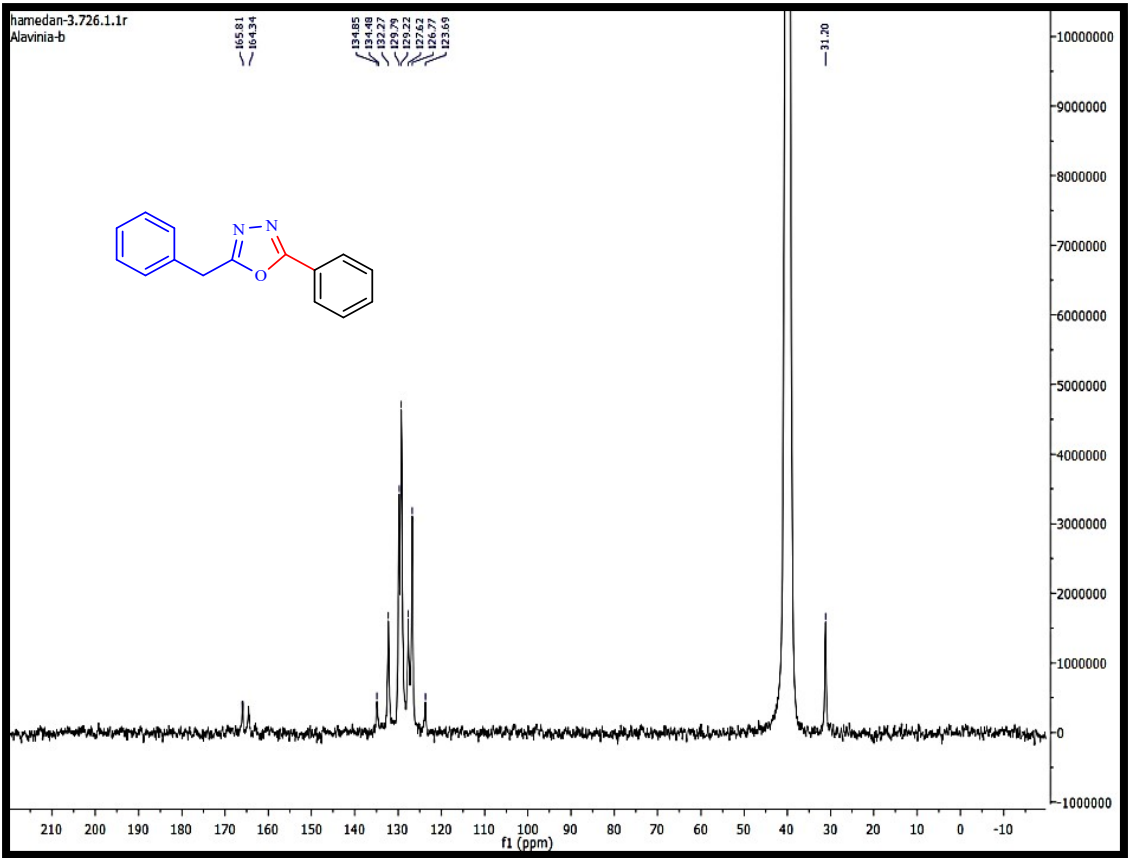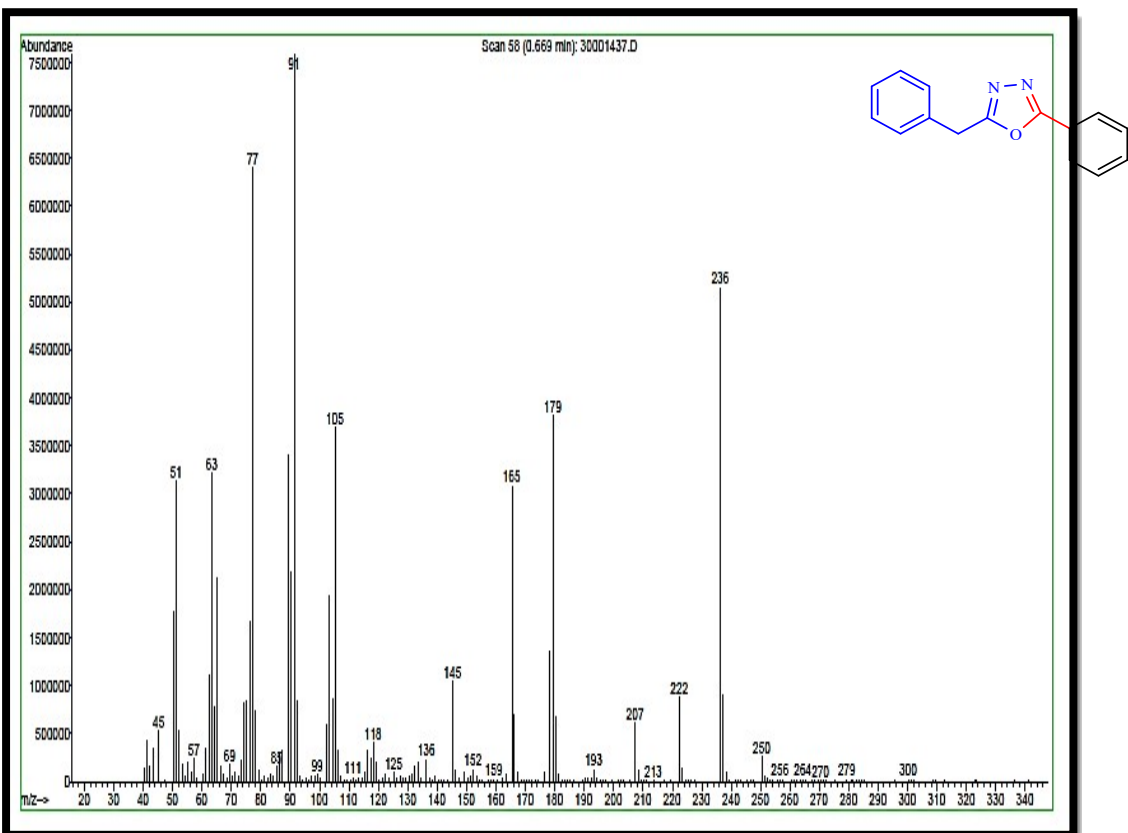

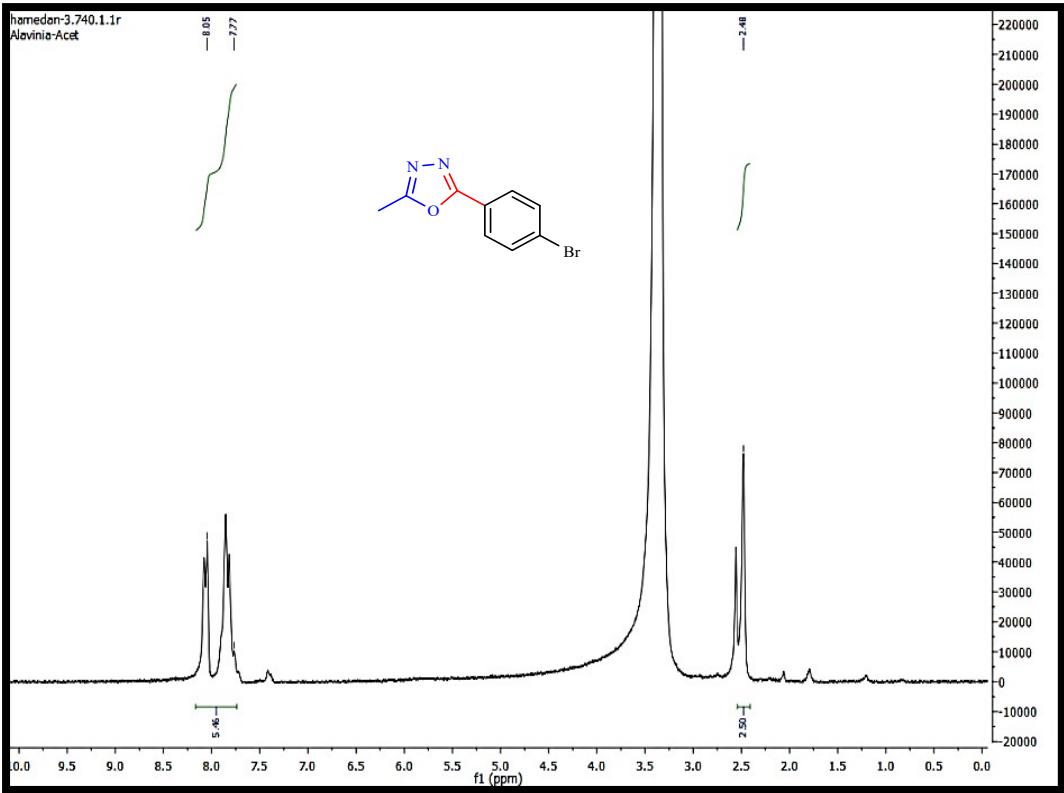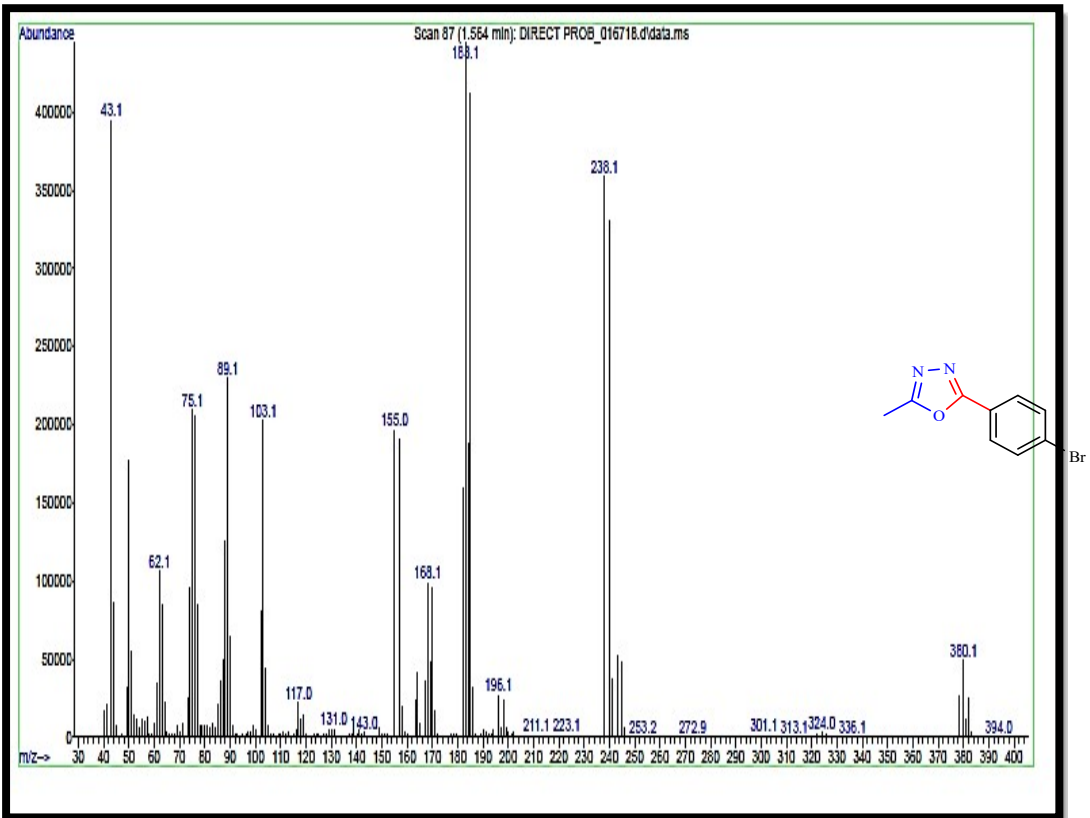

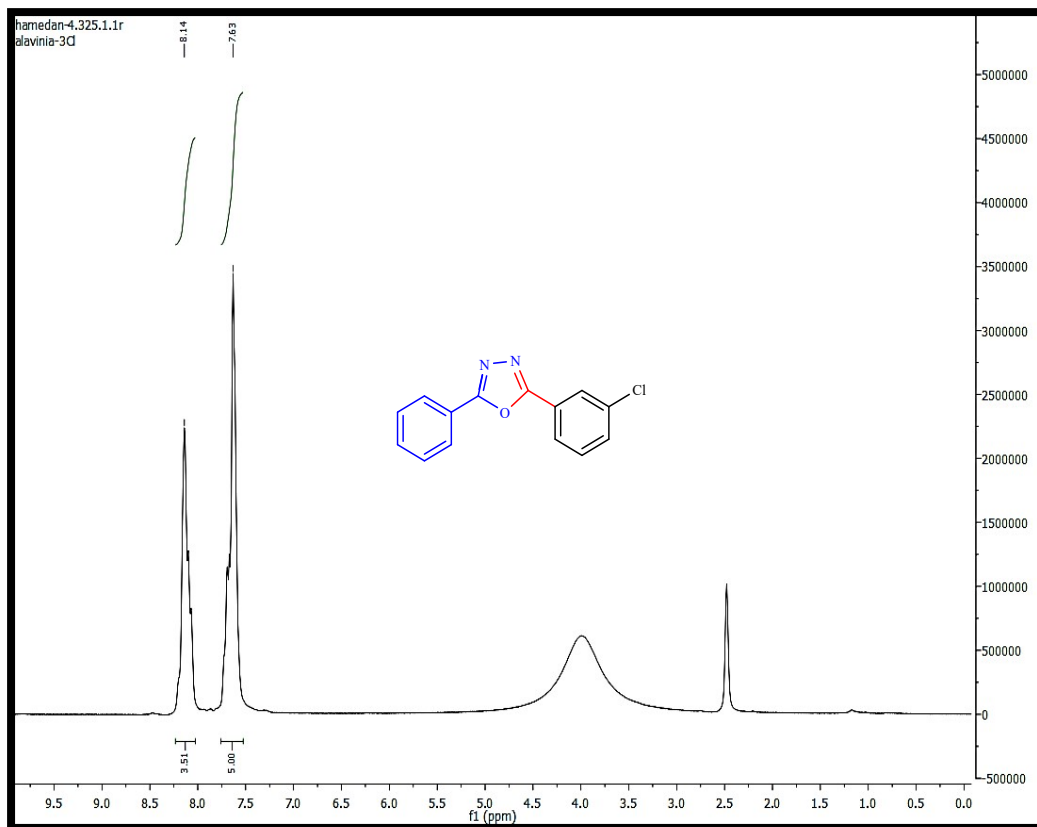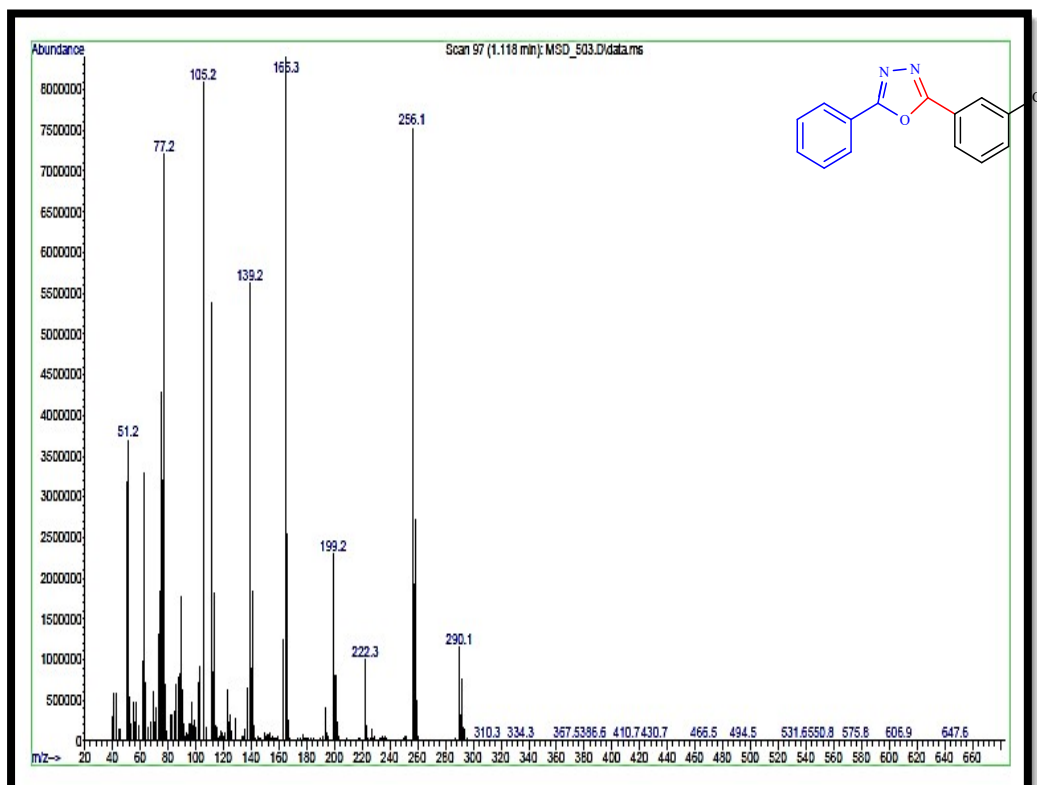

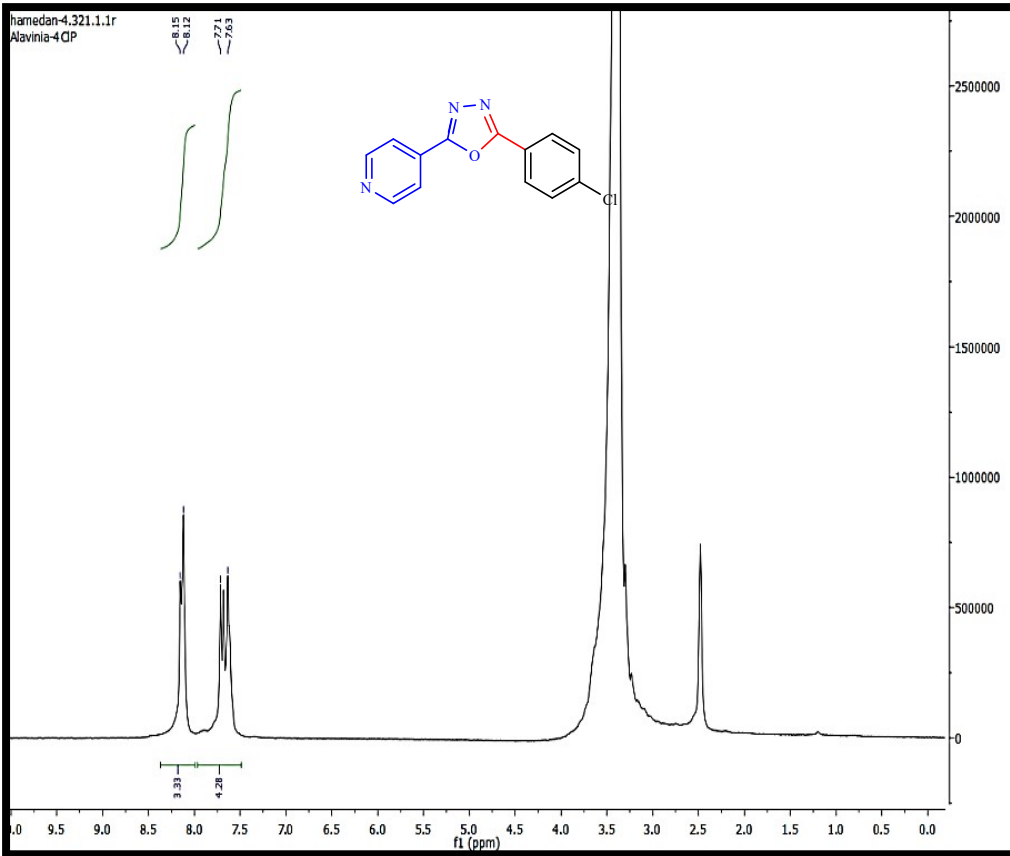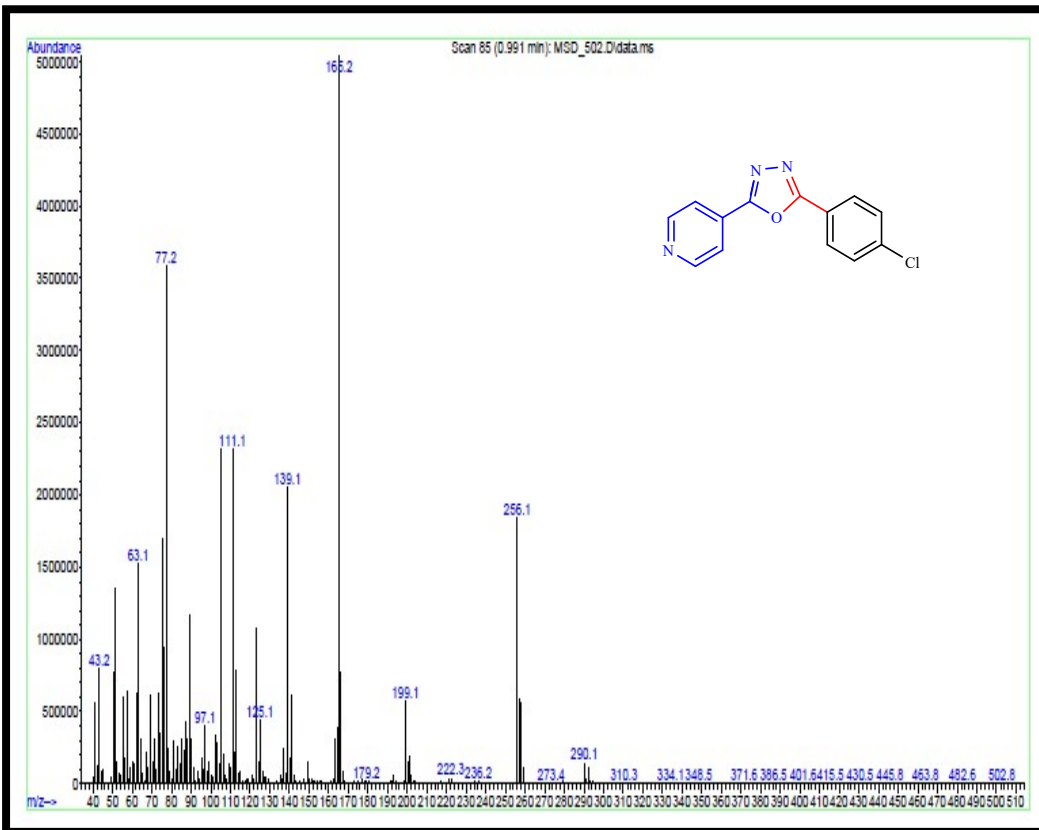

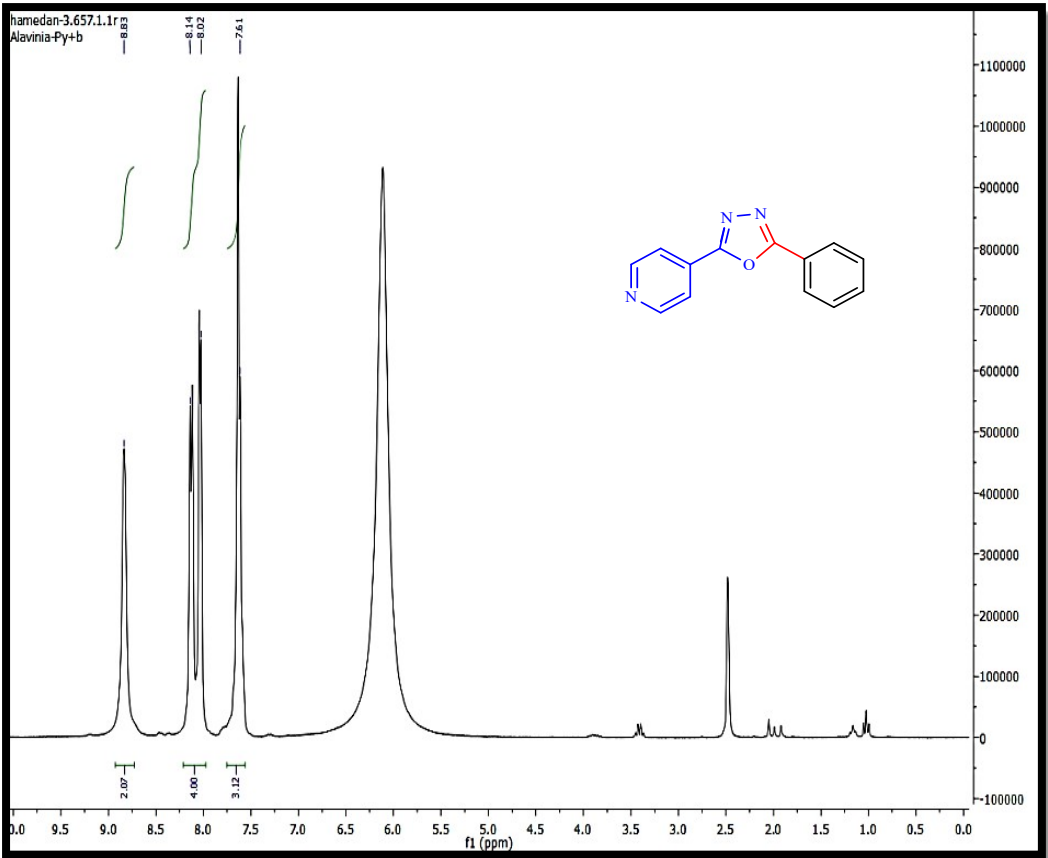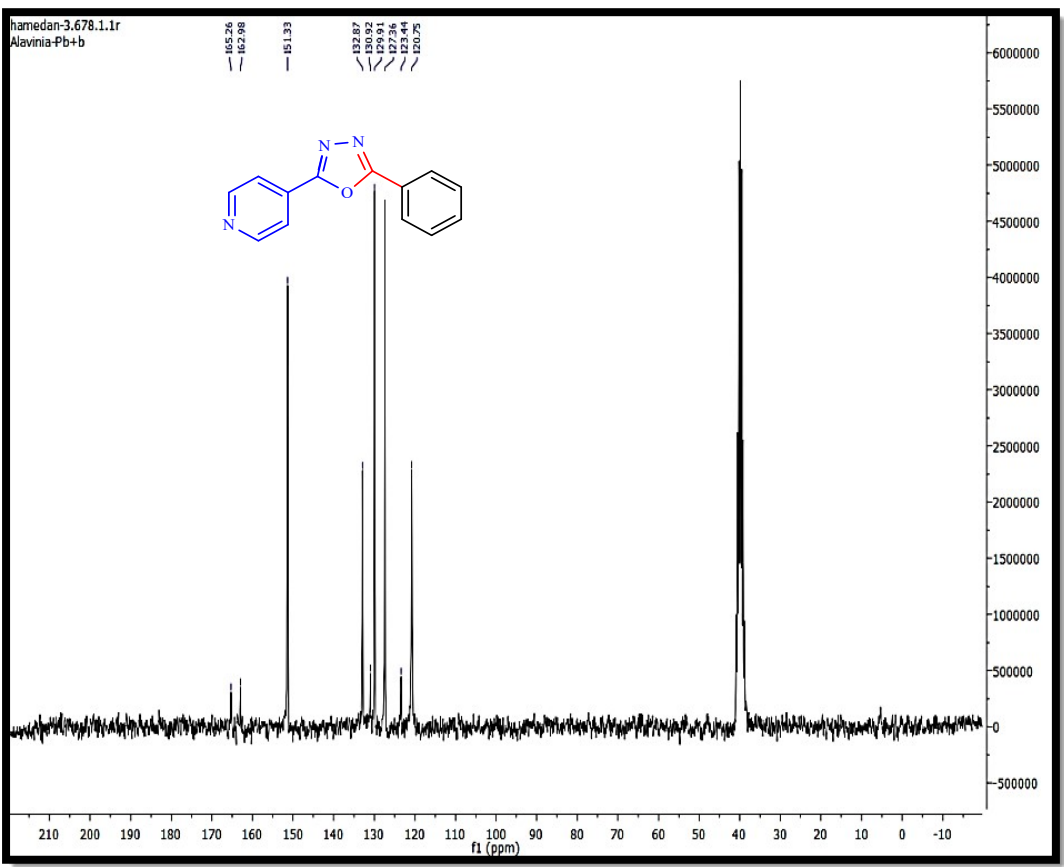

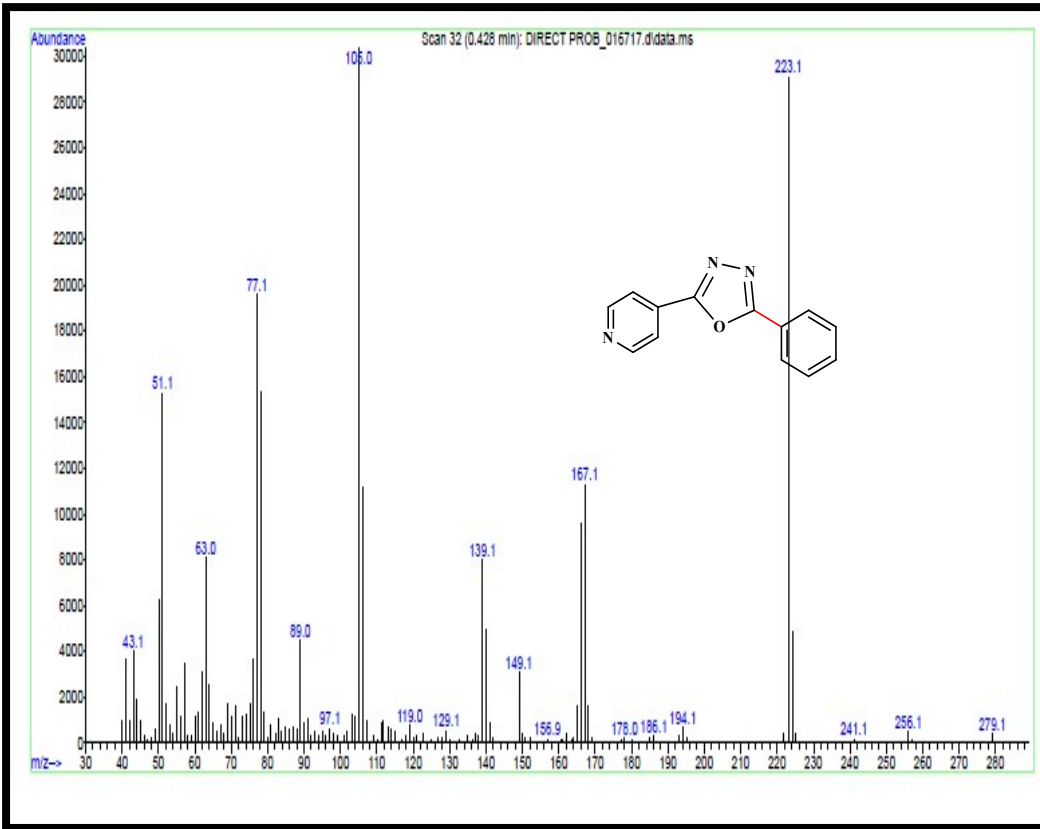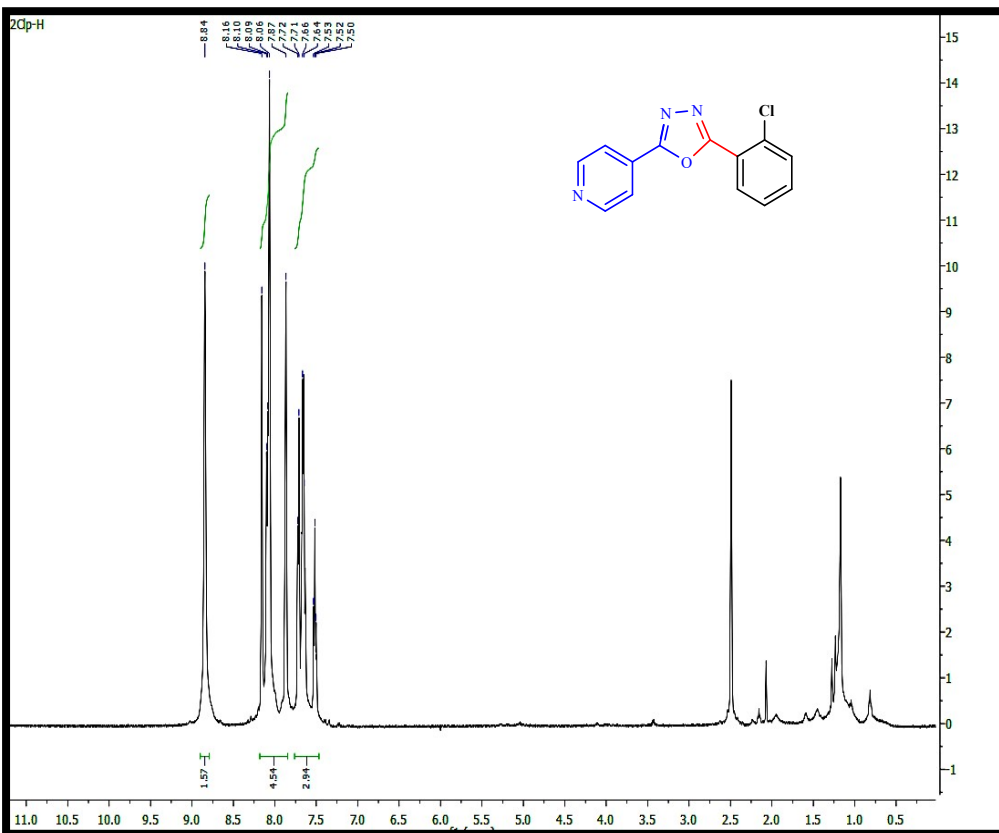



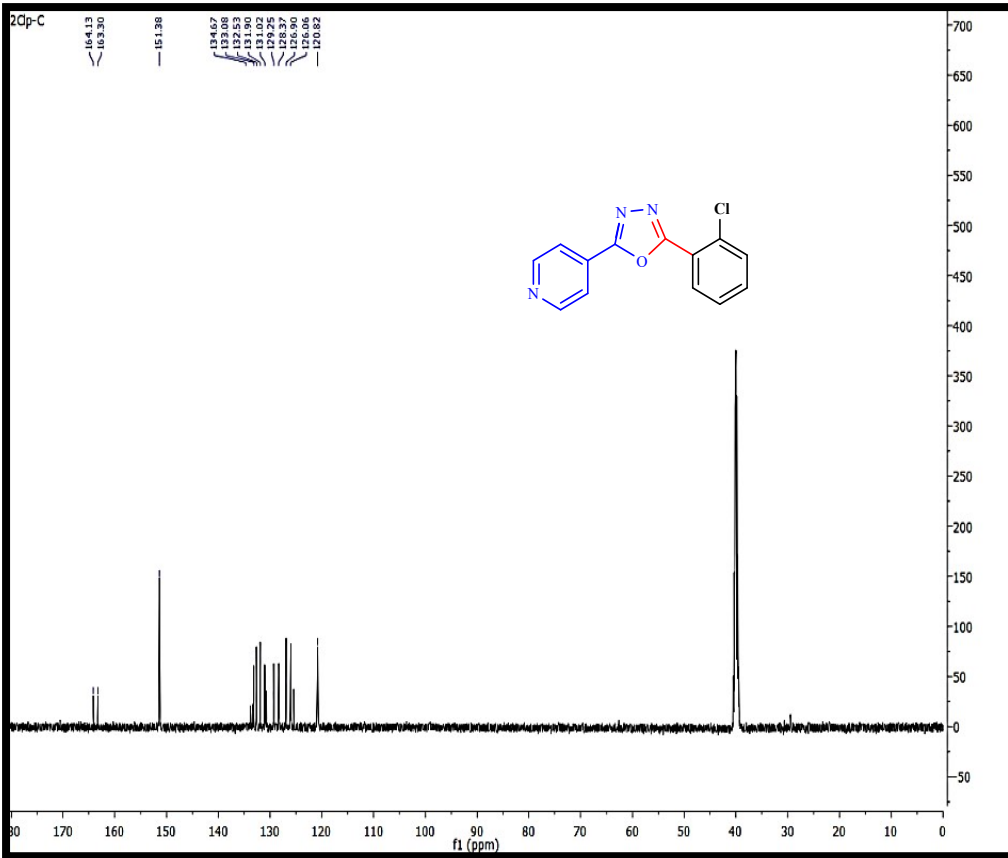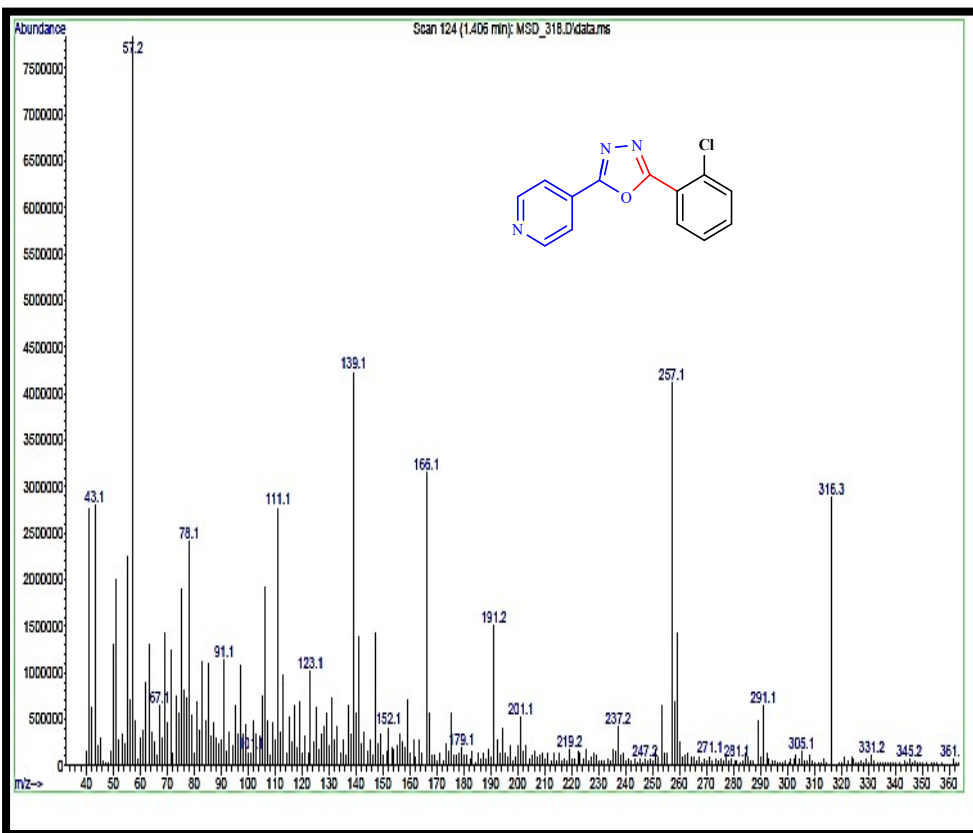

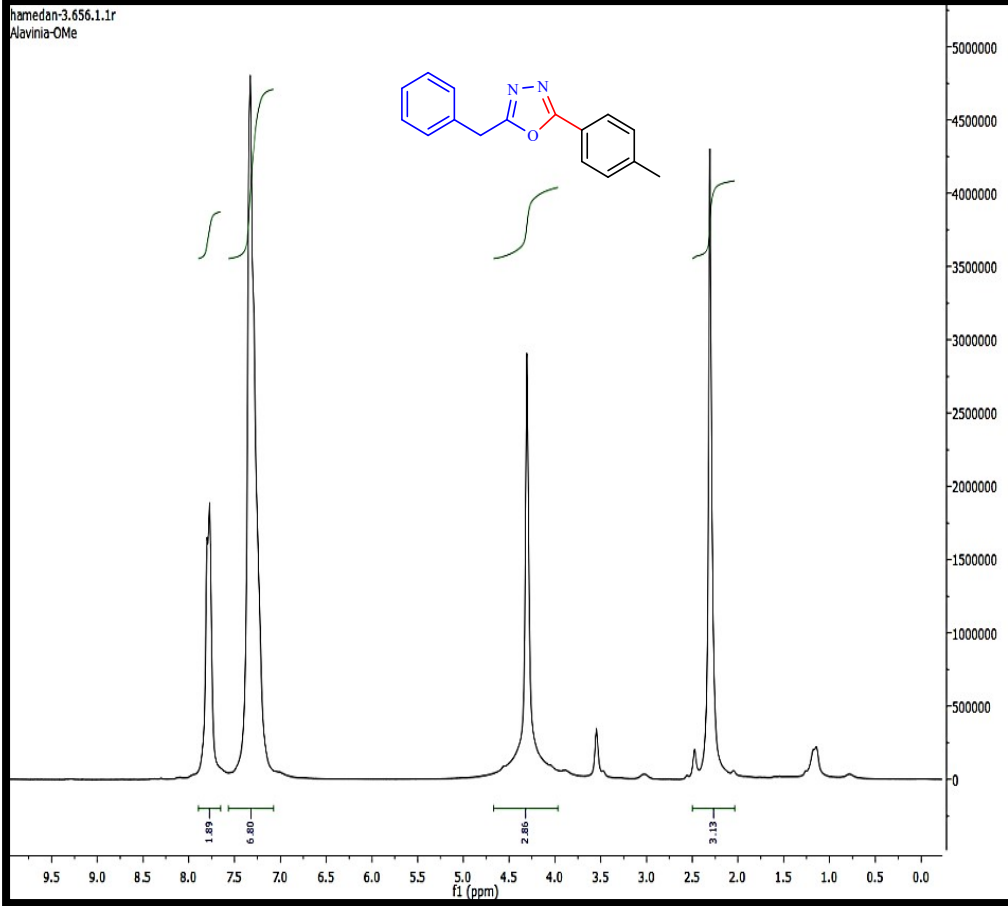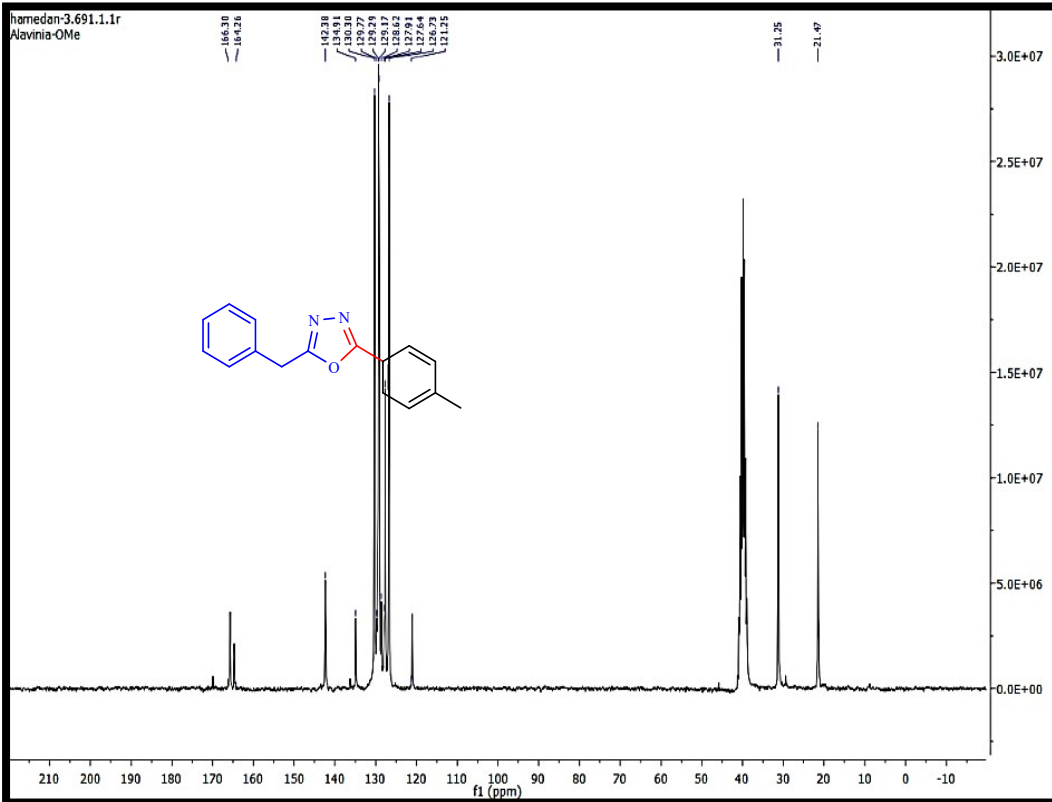

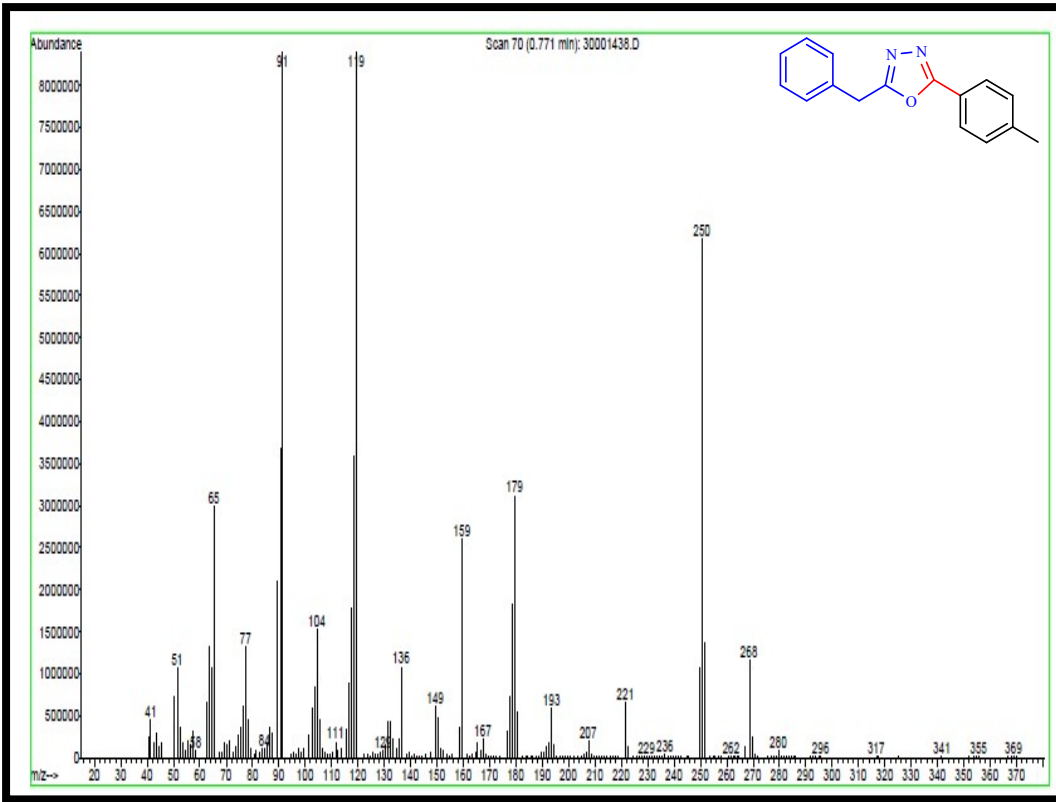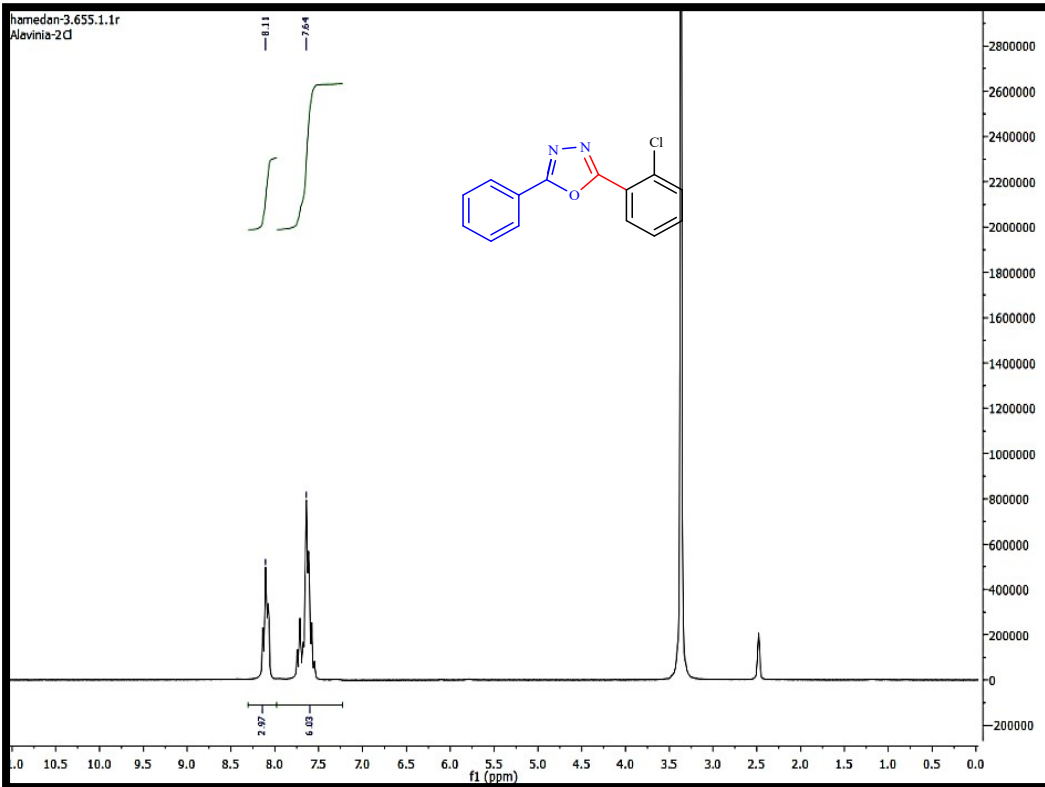

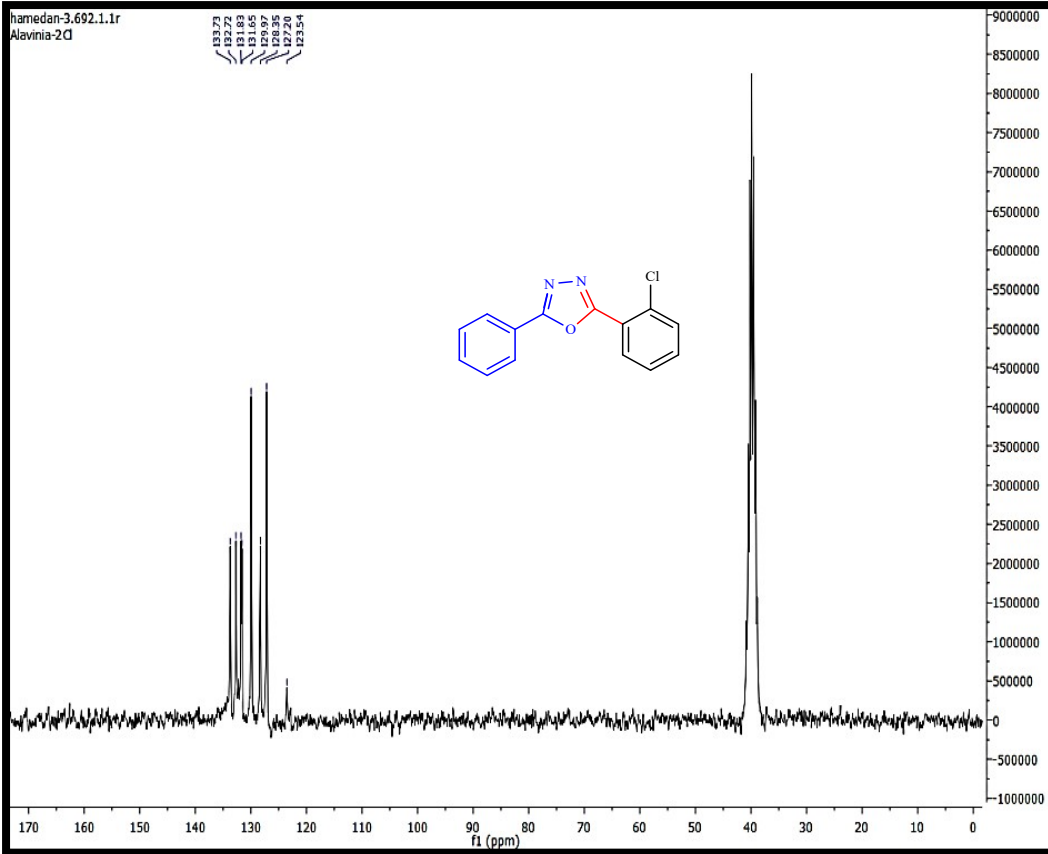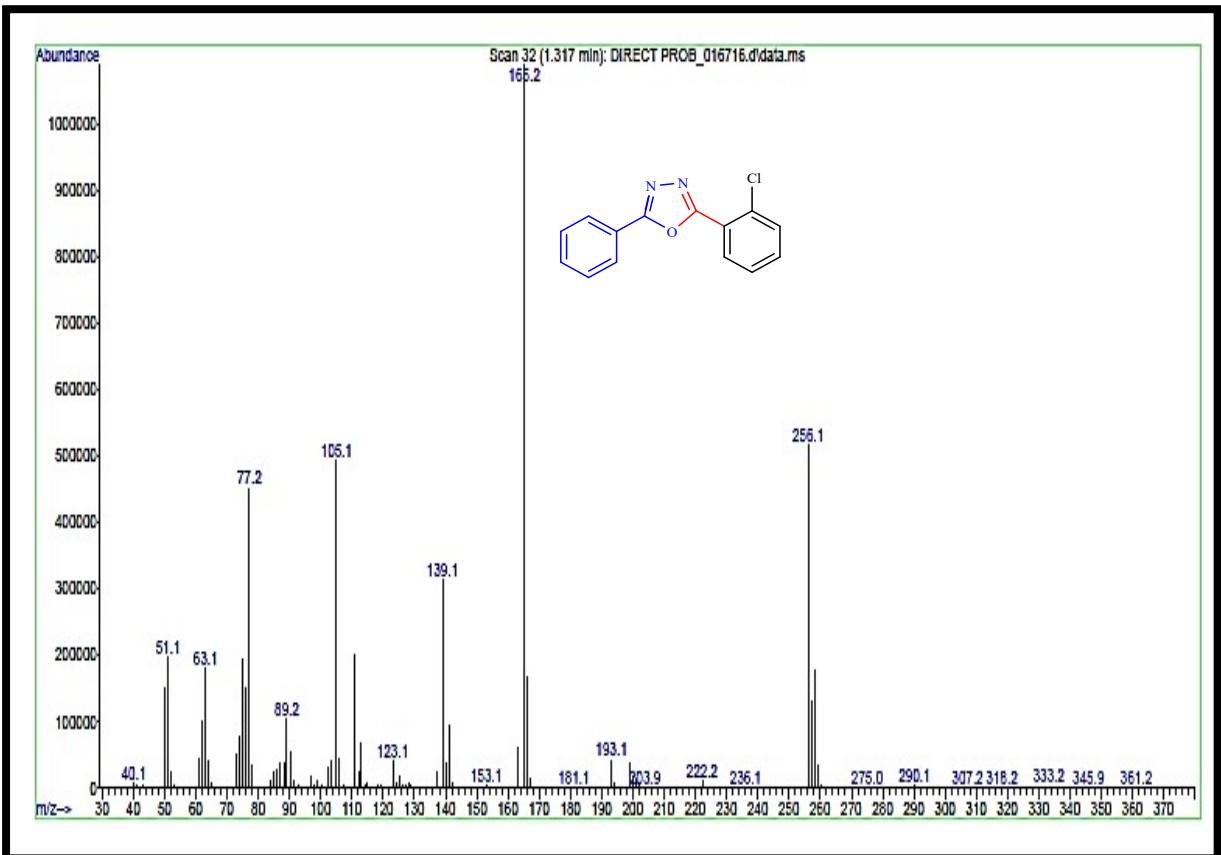

Alavinia- Sedigheh-EN960515-189..205

H1 DMSO D<sub>6</sub> Administrator 52

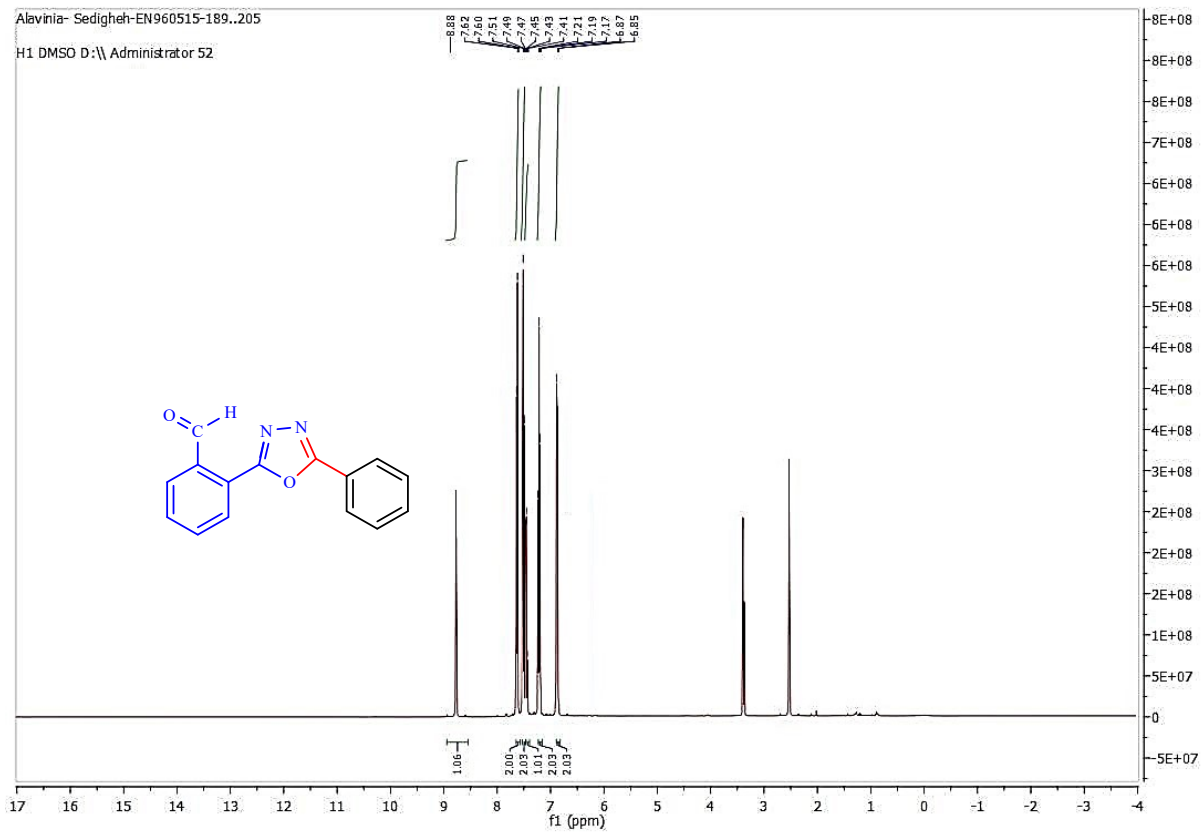

2fo-C

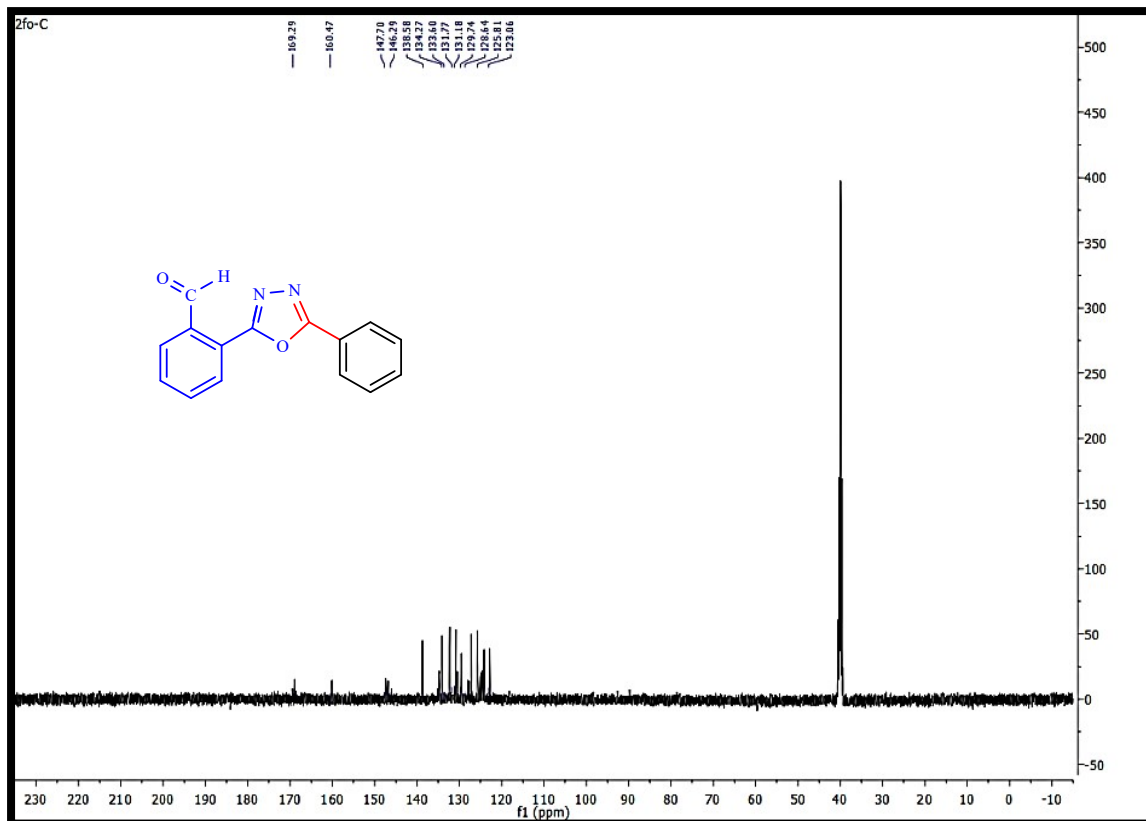

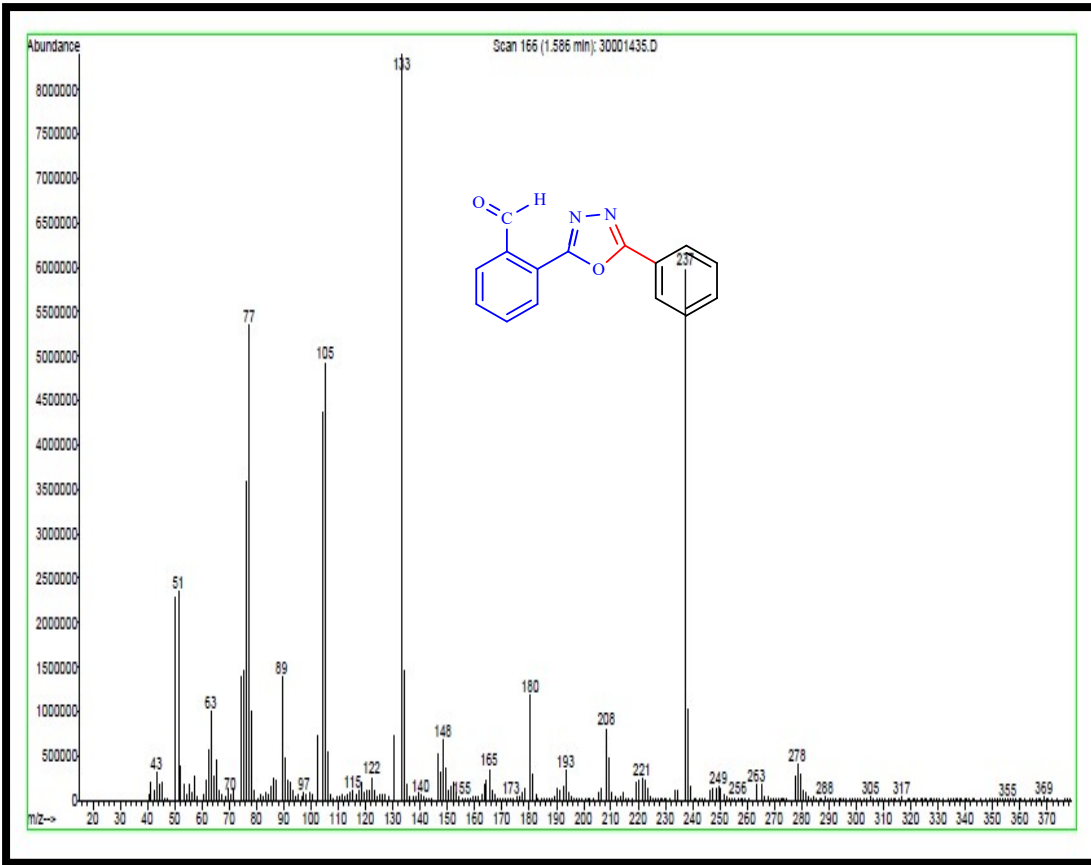

Alavinia- Sedigheh-EN960515-189..205

H1 CDCl3 D:\Administrator 34

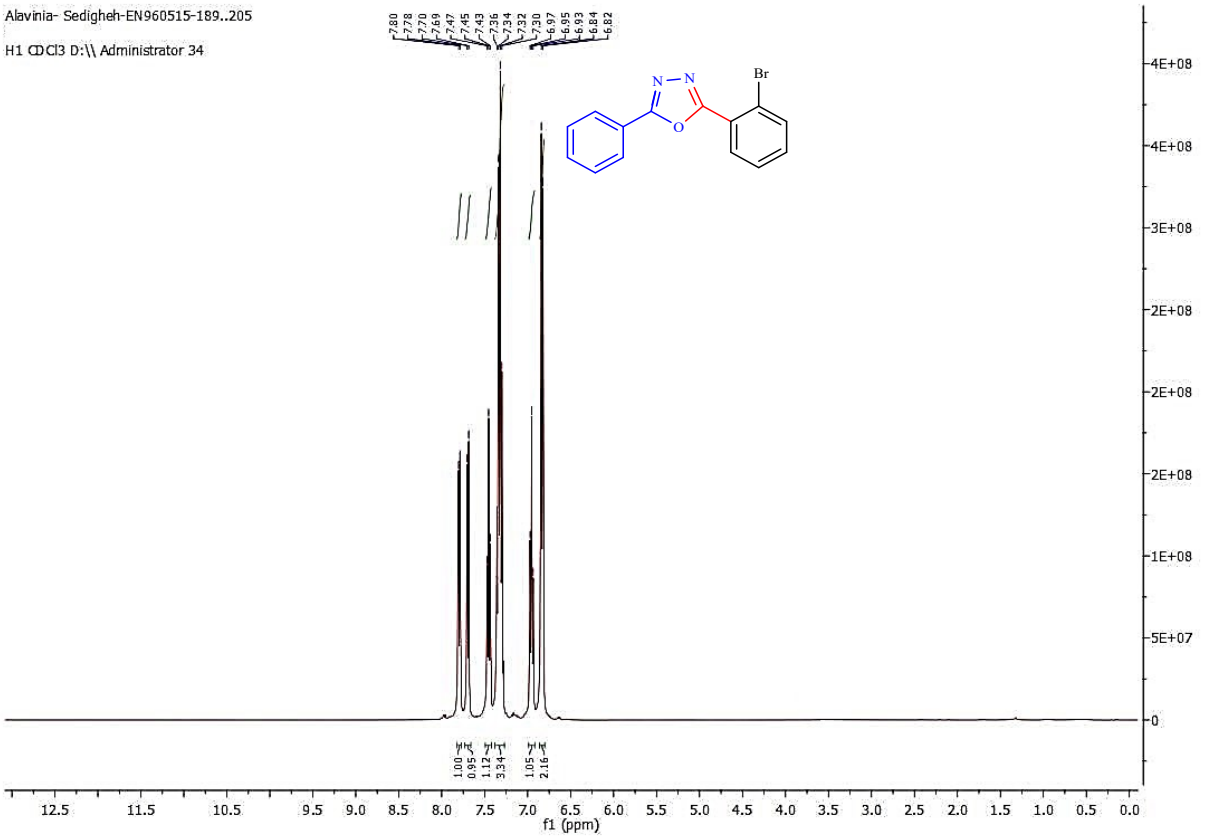



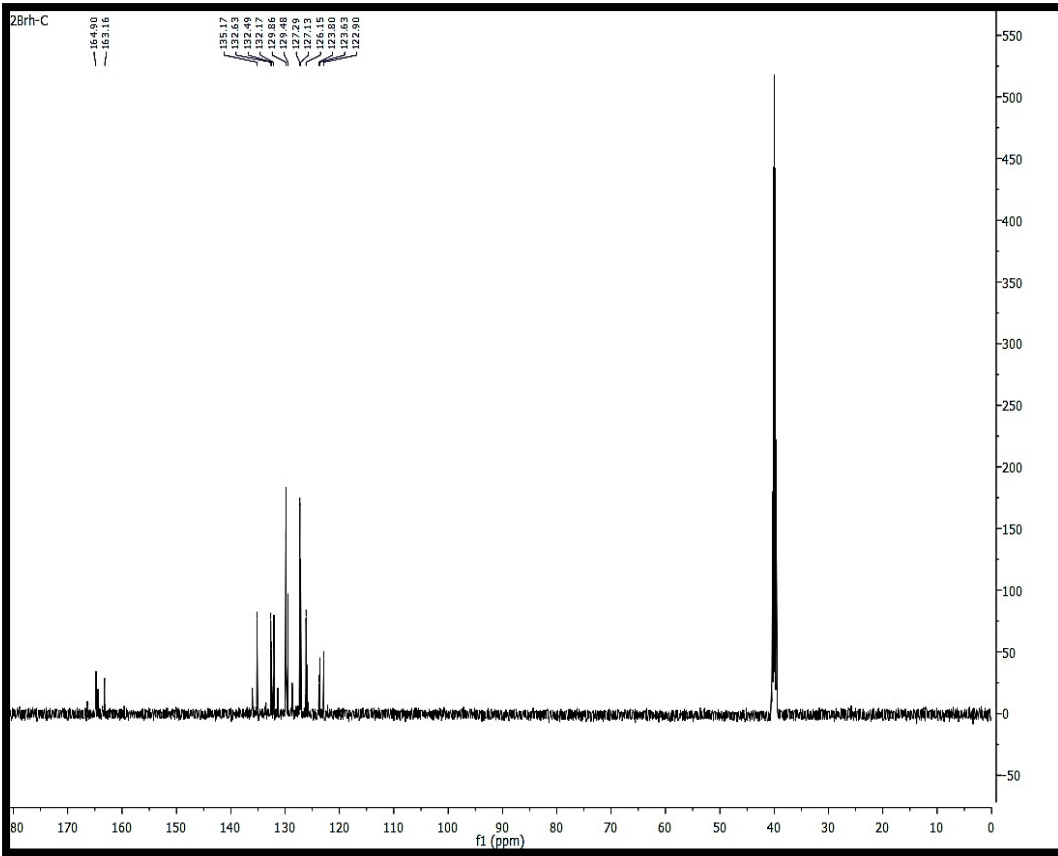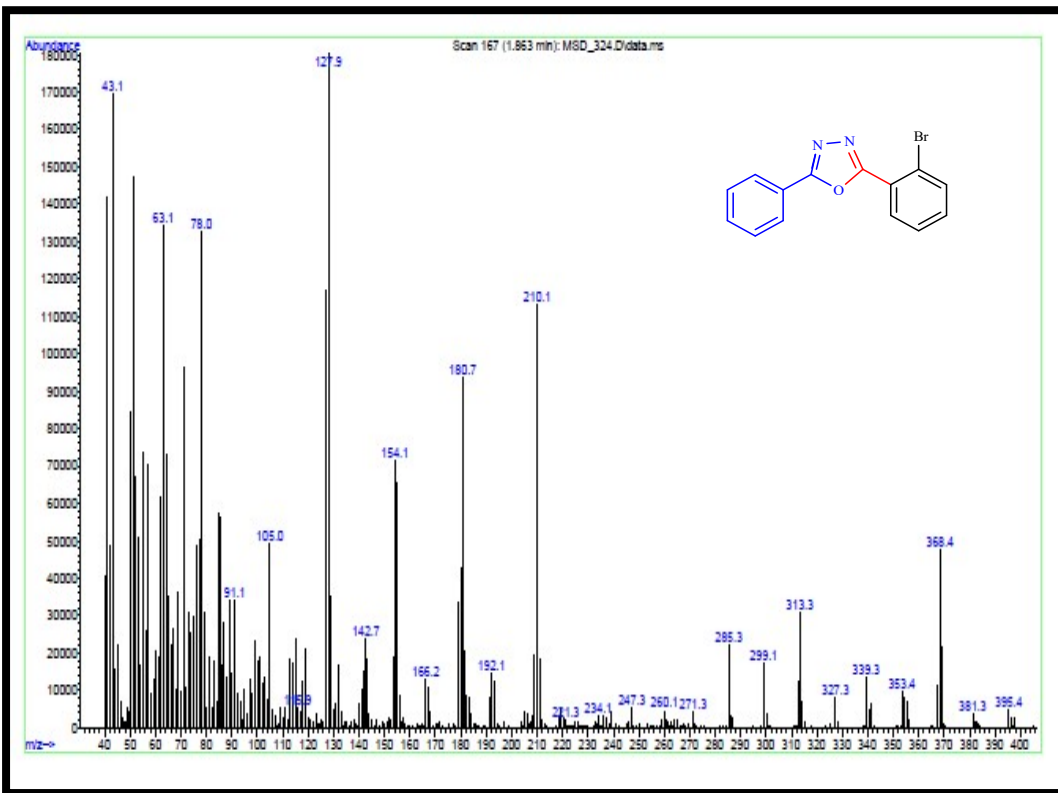

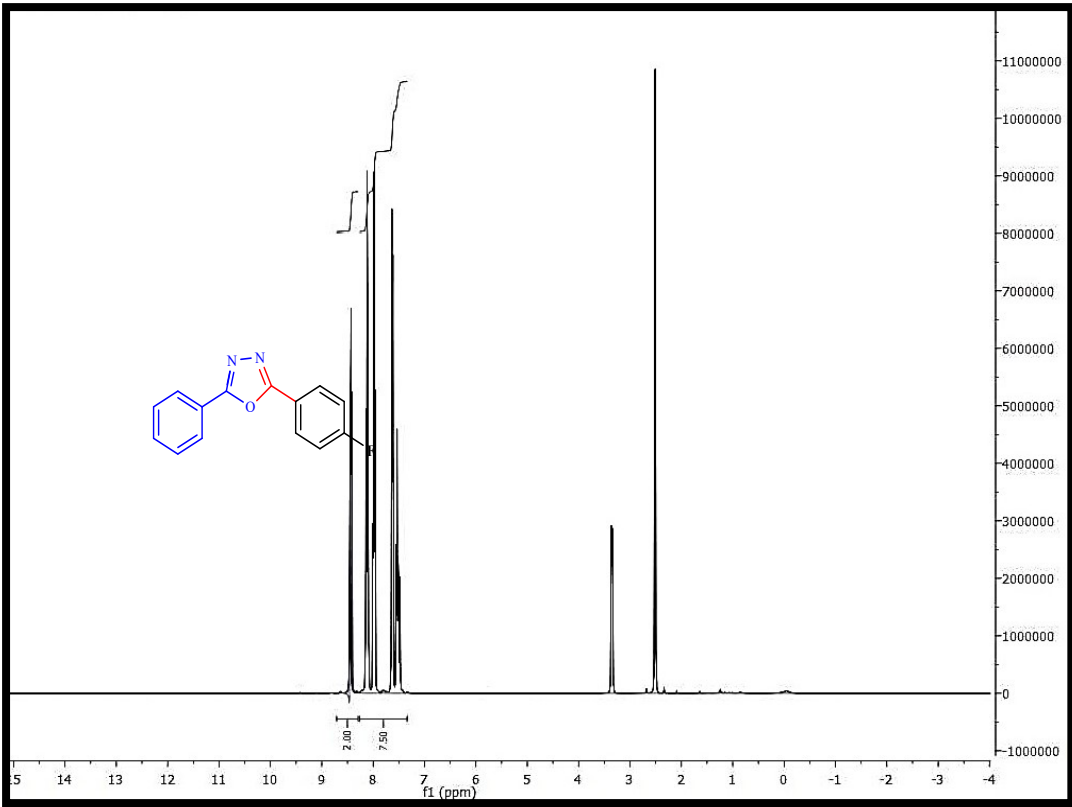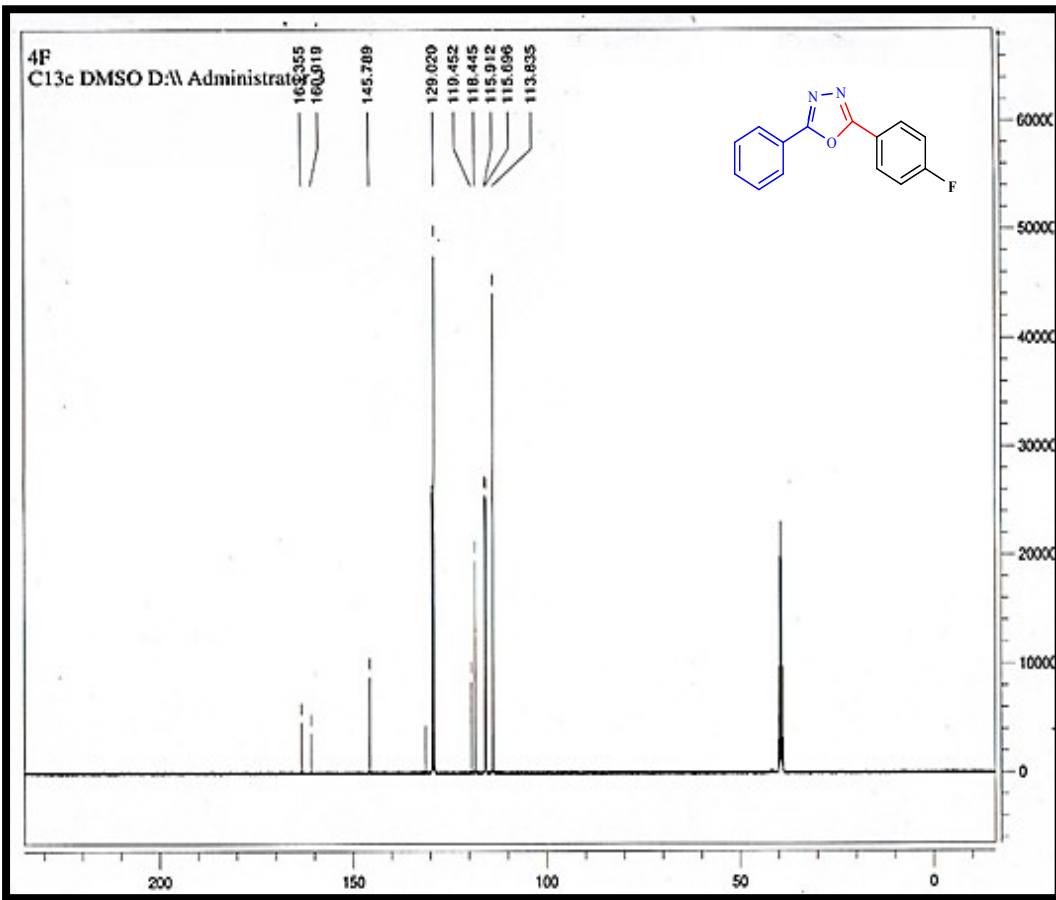

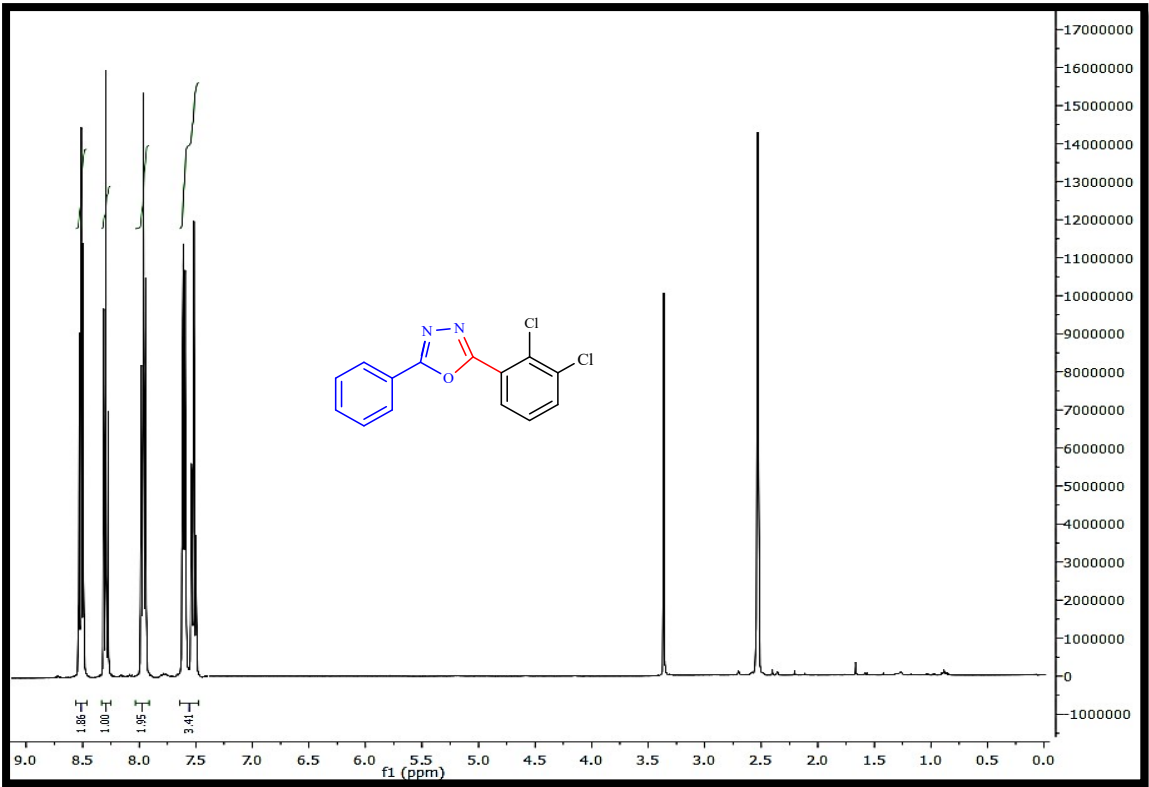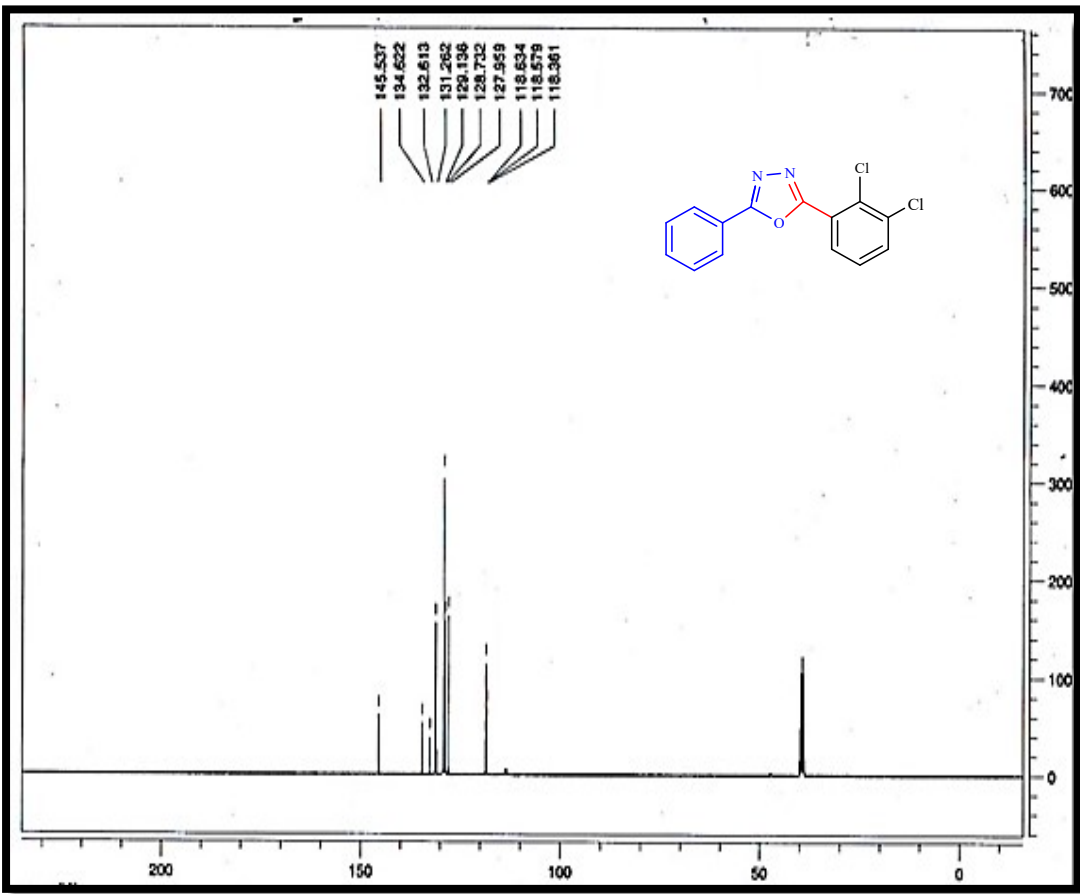

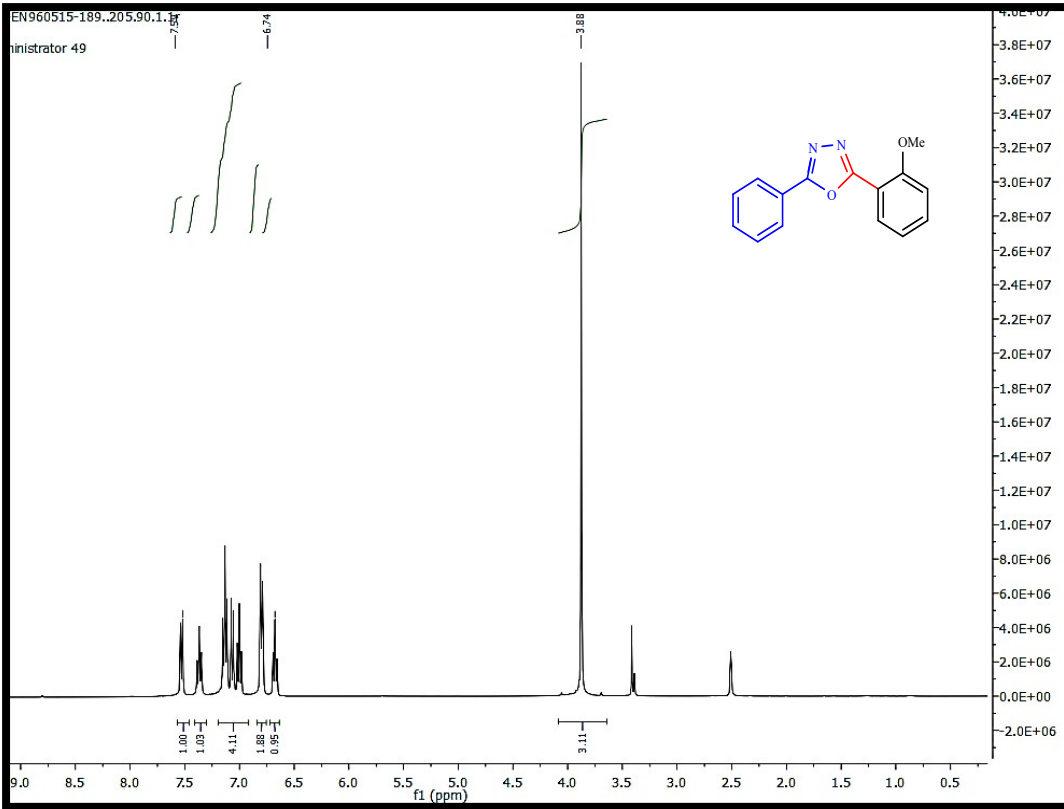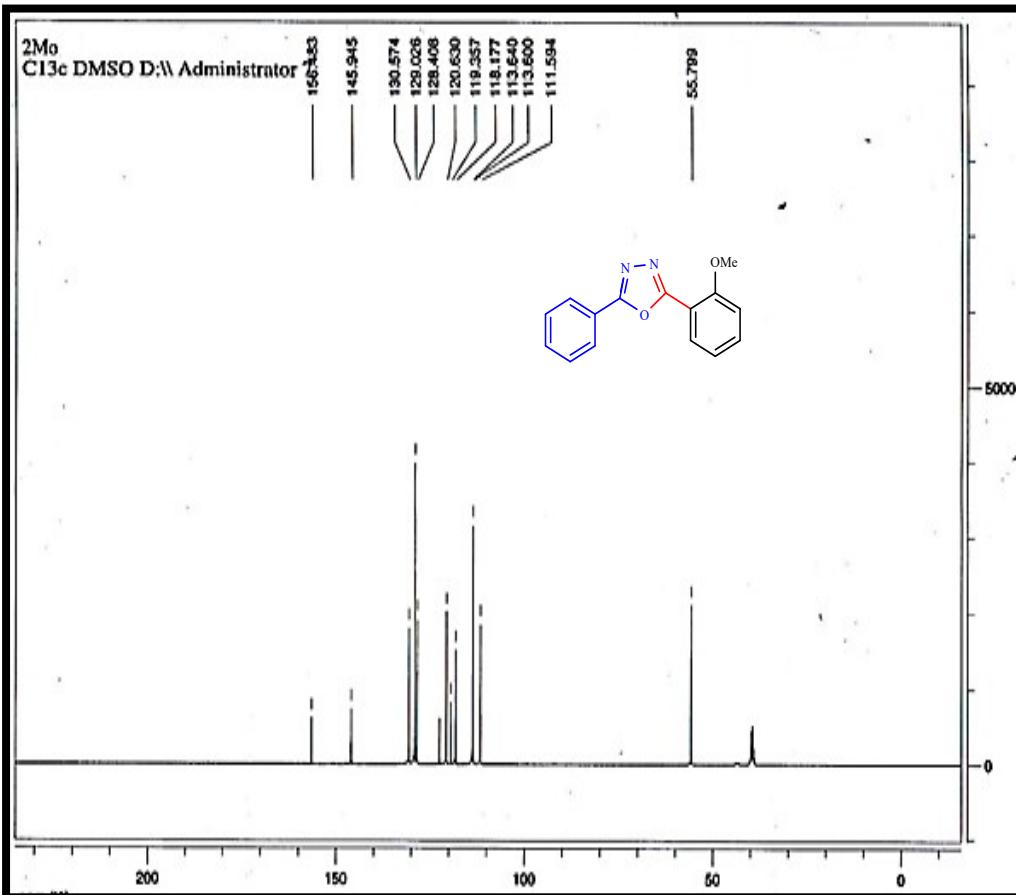

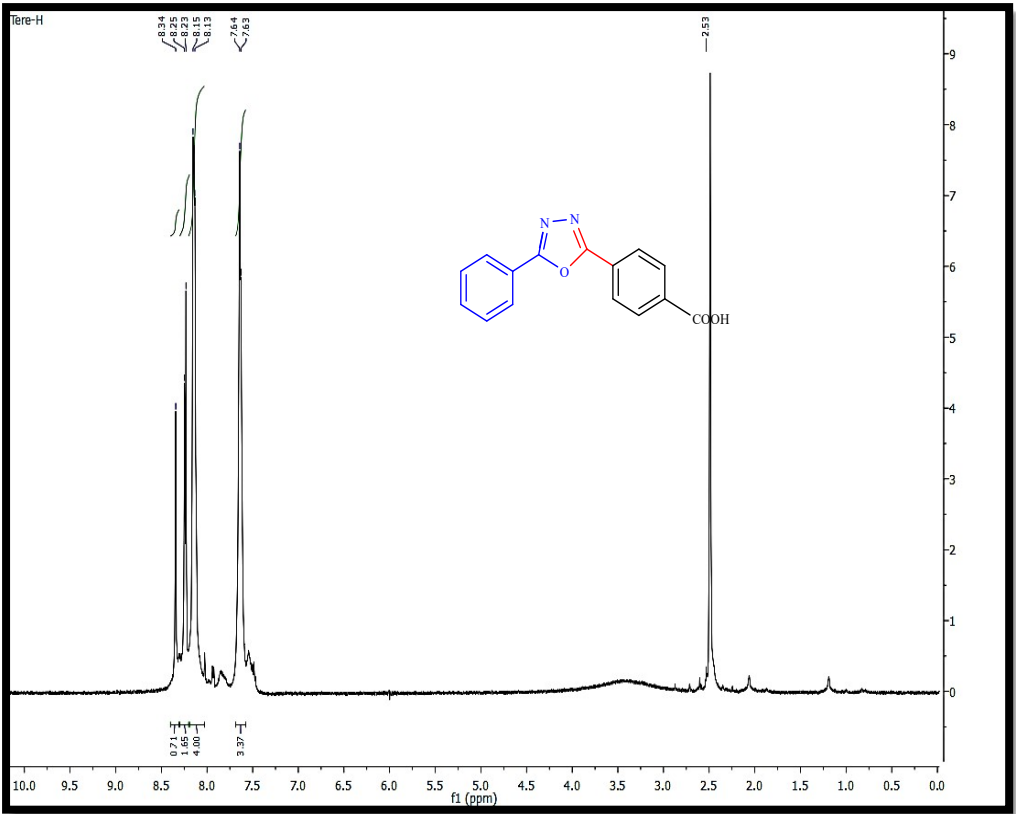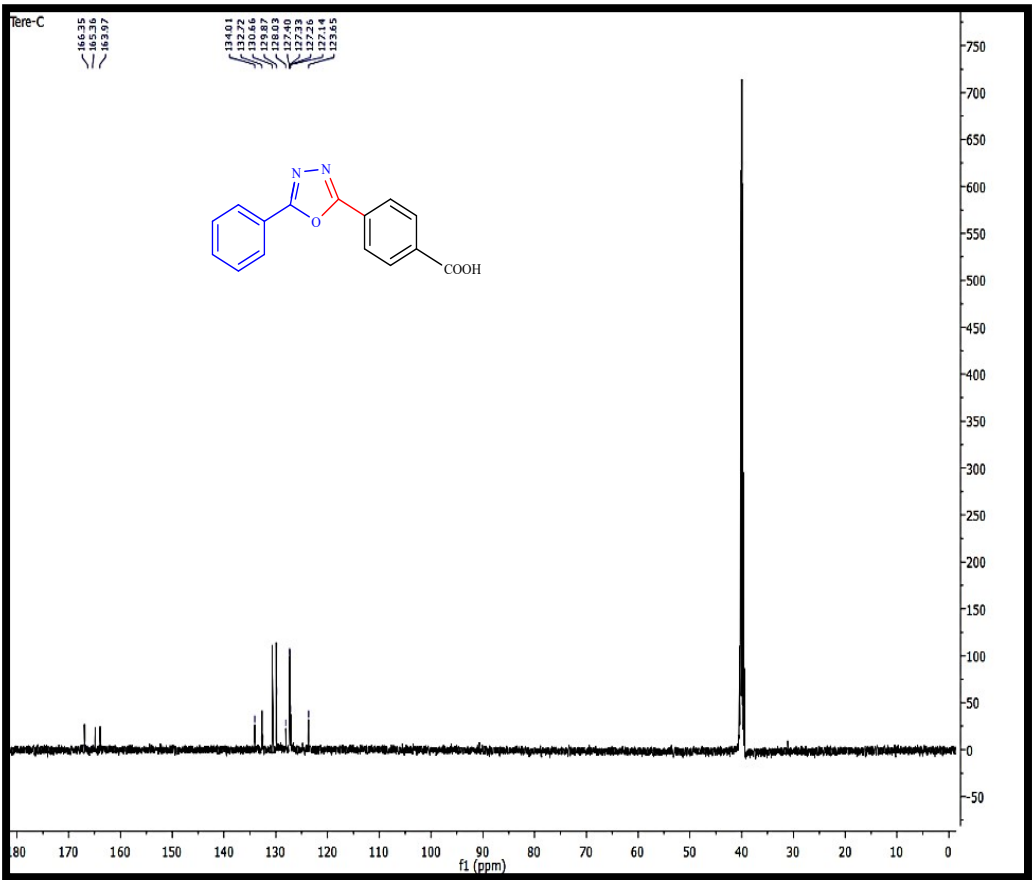

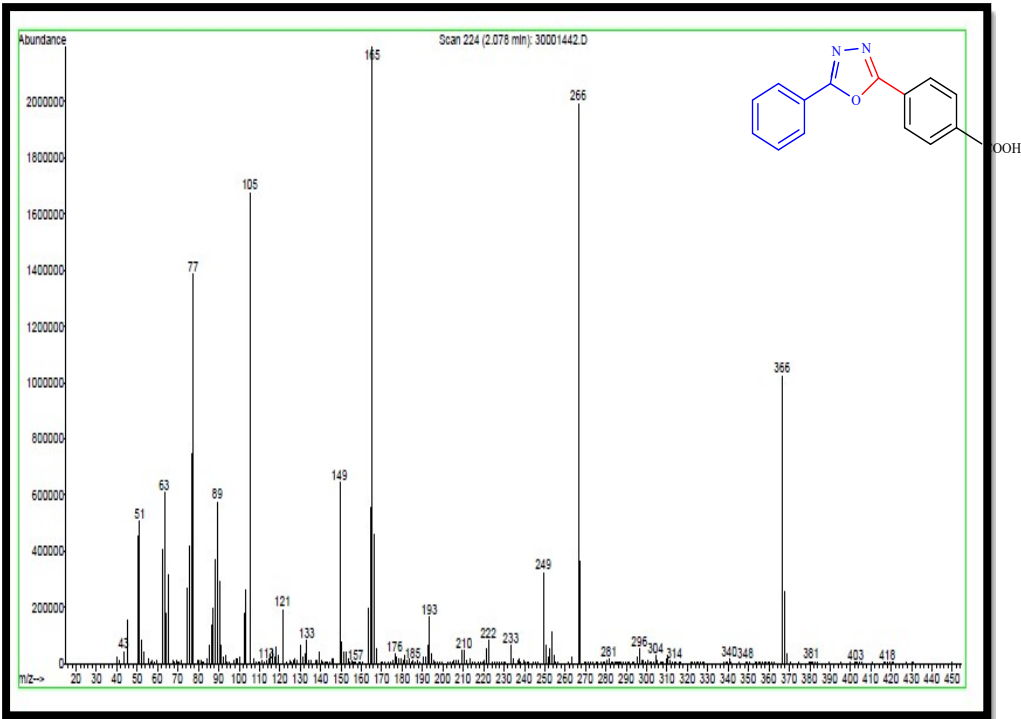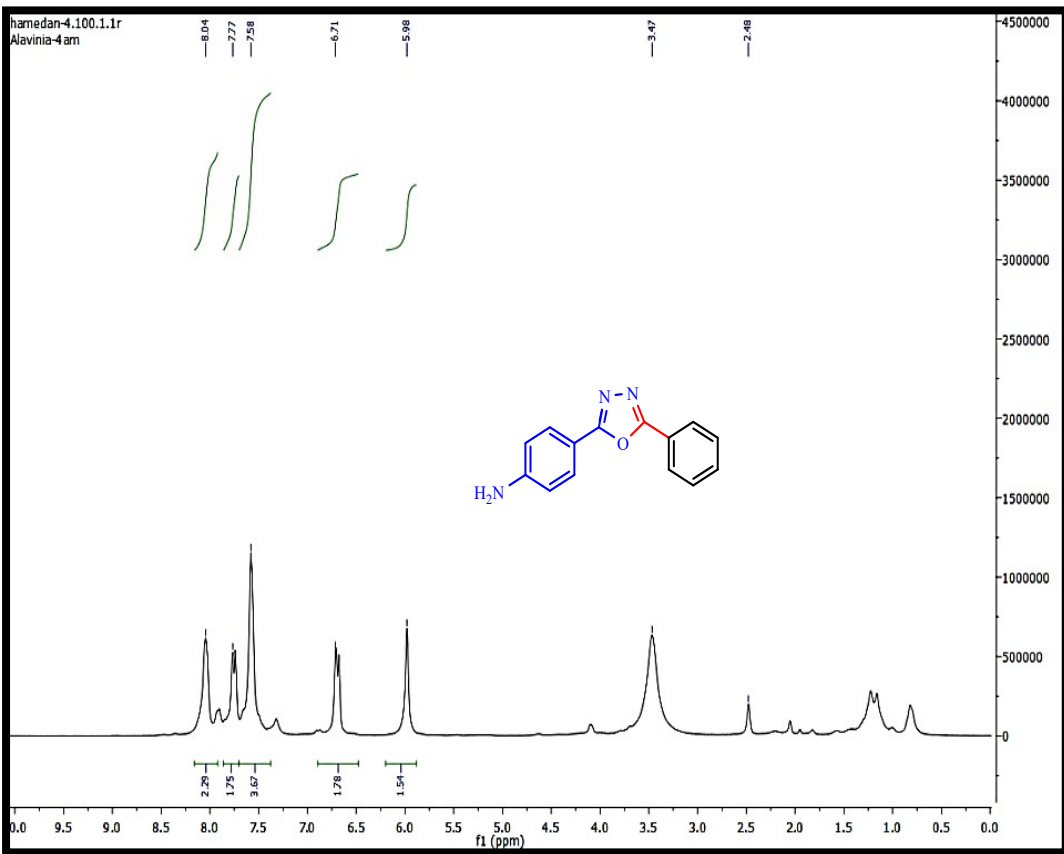

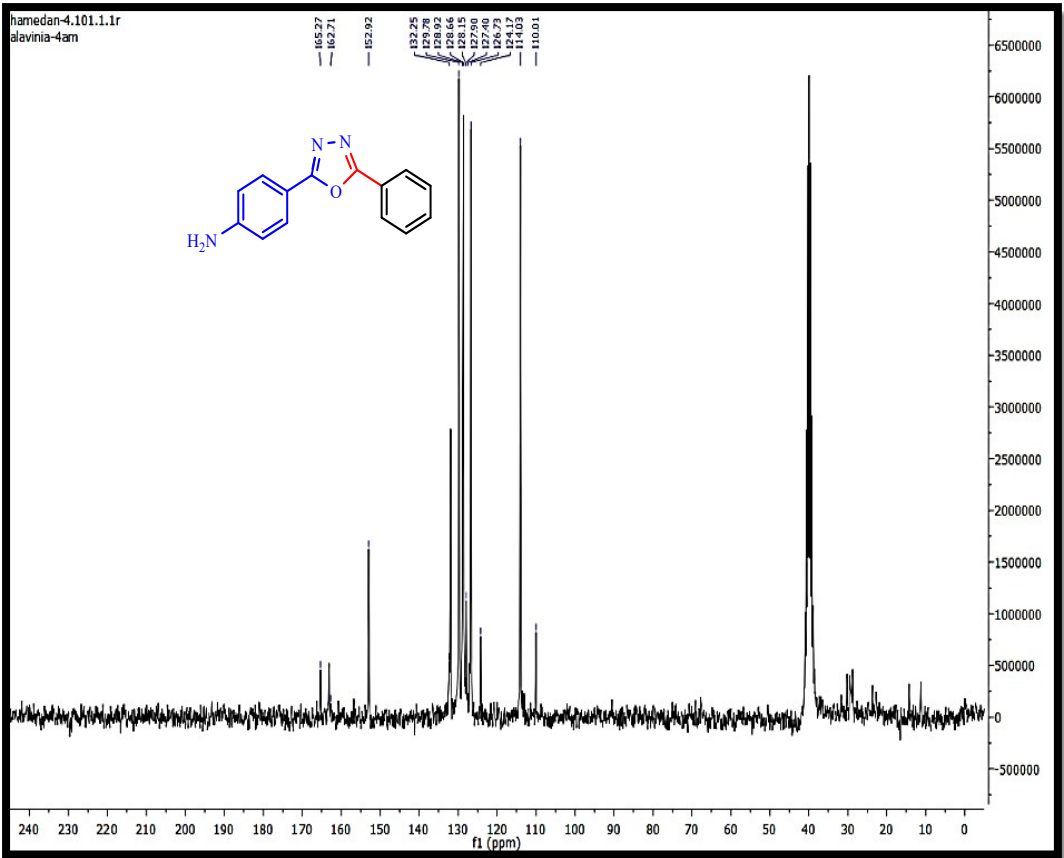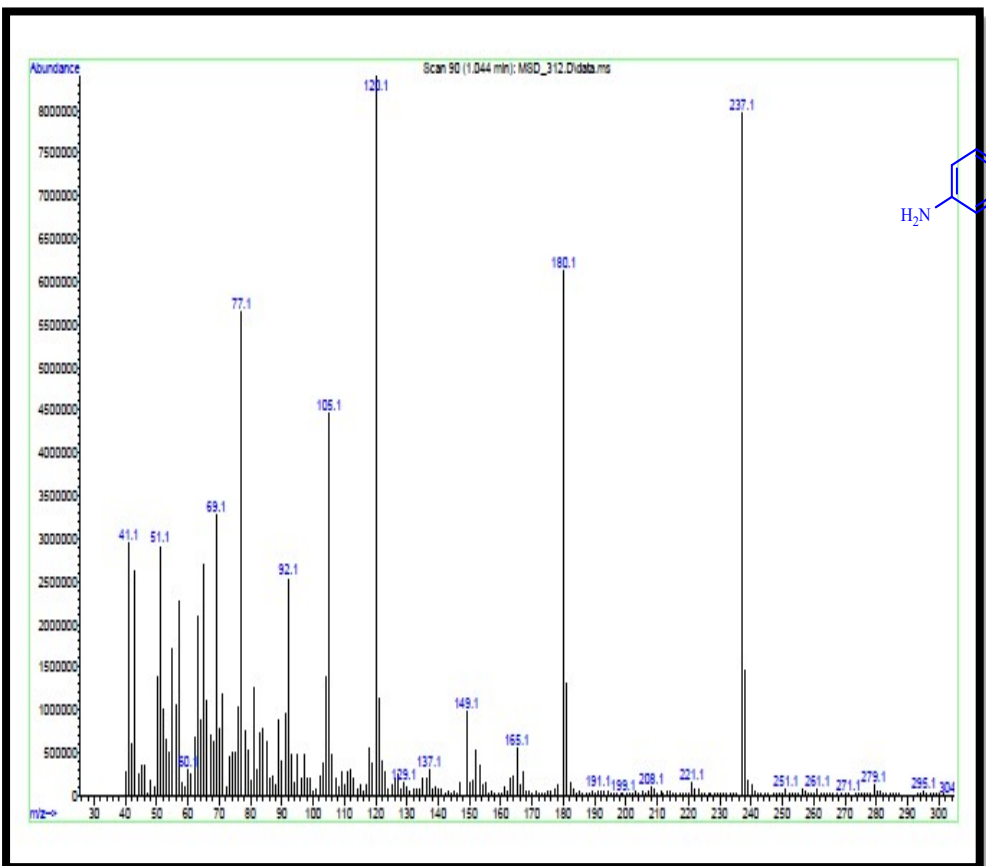

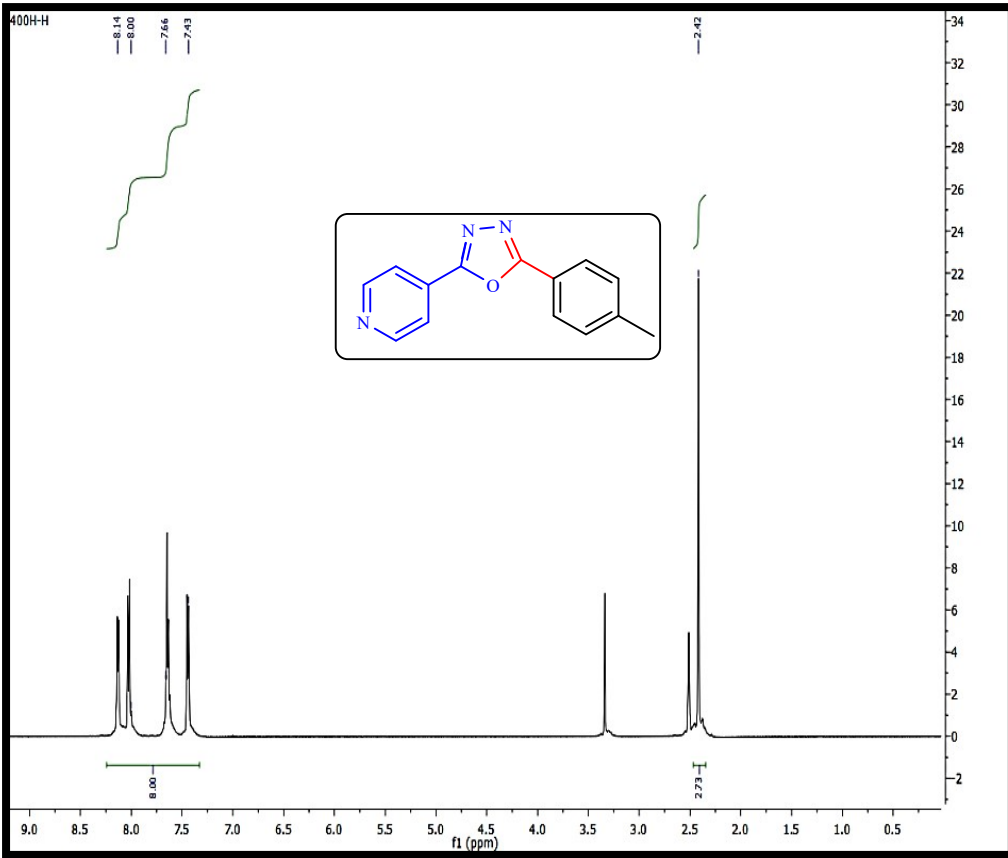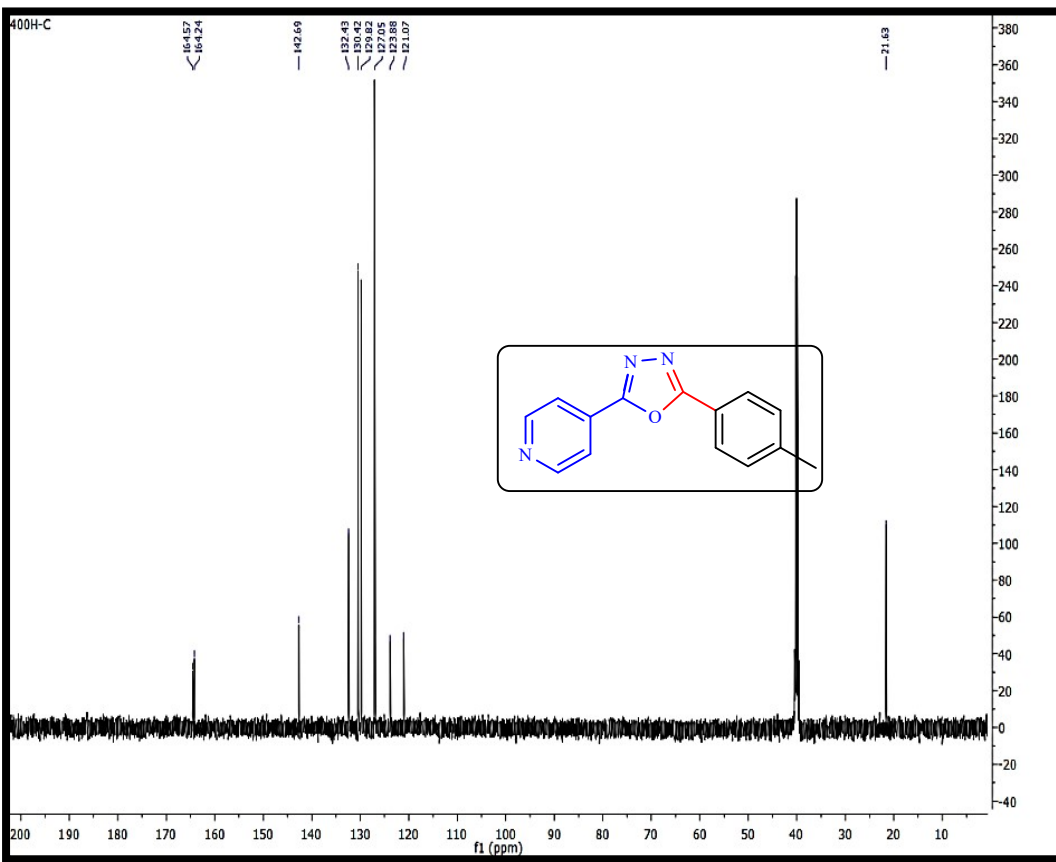

Supplement: d1ra04022g1.pdf [file d1ra04022g1.pdf]
